RESEARCH ARTICLE

# New function of aldoxime dehydratase: Redox catalysis and the formation of an expected product

Masatoshi Yamada<sup>1</sup>\*, Yoshiteru Hashimoto<sup>1</sup>\*, Takuto Kumano<sup>1</sup>, Seiya Tsujimura<sup>2</sup>, Michihiko Kobayashi<sup>1</sup>\*

**1** Institute of Applied Biochemistry and Graduate School of Life and Environmental Sciences, The University of Tsukuba, Tsukuba, Ibaraki, Japan, **2** Division of Materials Science, Faculty of Pure and Applied Sciences, The University of Tsukuba, Tsukuba, Ibaraki, Japan

\* These authors contributed equally to this work.

\* [kobayashi.m.fe@u.tsukuba.ac.jp](mailto:kobayashi.m.fe@u.tsukuba.ac.jp)

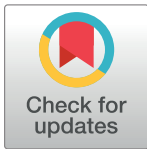

**OPEN ACCESS**

**Citation:** Yamada M, Hashimoto Y, Kumano T, Tsujimura S, Kobayashi M (2017) New function of aldoxime dehydratase: Redox catalysis and the formation of an expected product. PLoS ONE 12 (4): e0175846. <https://doi.org/10.1371/journal.pone.0175846>

**Editor:** Claudio M Soares, Universidade Nova de Lisboa Instituto de Tecnologia Quimica e Biologica, PORTUGAL

**Received:** November 18, 2016

**Accepted:** March 31, 2017

**Published:** April 14, 2017

**Copyright:** © 2017 Yamada et al. This is an open access article distributed under the terms of the [Creative Commons Attribution License](https://creativecommons.org/licenses/by/4.0/), which permits unrestricted use, distribution, and reproduction in any medium, provided the original author and source are credited.

**Data Availability Statement:** All relevant data are within the paper and its Supporting Information files.

**Funding:** This work was supported by a Grant-in-Aid for Scientific Research from the Ministry of Education, Culture, Sports, Science and Technology (MEXT), Japan.

**Competing interests:** The authors have declared that no competing interests exist.

## Abstract

In general, hemoproteins are capable of catalyzing redox reactions. Aldoxime dehydratase (OxdA), which is a unique heme-containing enzyme, catalyzes the dehydration of aldoximes to the corresponding nitriles. Its reaction is a rare example of heme directly activating an organic substrate, unlike the utilization of H<sub>2</sub>O<sub>2</sub> or O<sub>2</sub> as a mediator of catalysis by other heme-containing enzymes. While it is unknown whether OxdA catalyzes redox reactions or not, we here for the first time detected catalase activity (which is one of the redox activities) of wild-type OxdA, OxdA(WT). Furthermore, we constructed a His320 → Asp mutant of OxdA [OxdA(H320D)], and found it exhibits catalase activity. Determination of the kinetic parameters of OxdA(WT) and OxdA(H320D) revealed that their *K<sub>m</sub>* values for H<sub>2</sub>O<sub>2</sub> were similar to each other, but the *k<sub>cat</sub>* value of OxdA(H320D) was 30 times higher than that of OxdA(WT). Next, we examined another redox activity and found it was the peroxidase activity of OxdAs. While both OxdA(WT) and OxdA(H320D) showed the activity, the activity of OxdA(H320D) was dozens of times higher than that of OxdA(WT). These findings demonstrated that the H320D mutation enhances the peroxidase activity of OxdA. OxdAs (WT and H320D) were found to catalyze another redox reaction, a peroxygenase reaction. During this reaction of OxdA(H320D) with 1-methoxynaphthalene as a substrate, surprisingly, the reaction mixture changed to a color different from that with OxdA(WT), which was due to the known product, Russig's blue. We purified and identified the new product as 1-methoxy-2-naphthalenol, which has never been reported as a product of the peroxygenase reaction, to the best of our knowledge. These findings indicated that the H320D mutation not only enhanced redox activities, but also significantly altered the hydroxylation site of the substrate.

## Introduction

We have widely investigated the microbial metabolism of toxic compounds containing a triple bond between carbon and nitrogen (e.g., nitriles [1–4] and isonitriles [5–7]). Microbial nitrile degradation proceeds through two different enzymatic pathways [8–9]. The enzymes (e.g., nitrilase [10–12], nitrile hydratase (NHase) [13–16], and amidase [17–19]) that are involved in both pathways have received much attention in applied [8, 20] as well as academic fields [12, 21]. From the *Pseudomonas chlororaphis* B23 [22] strain, we isolated an interesting heme enzyme [aliphatic aldoxime dehydratase (OxdA)] that catalyzes the dehydration of aliphatic aldoximes [R—CH = N—OH] to the corresponding nitriles. In this strain, the OxdA-dependent nitrile synthetic step is coupled with the nitrile-degradative step involving amidase and NHase [23, 24], which was formerly used as an industrial catalyst for acrylamide manufacture [8, 20, 25]. Through determination of the crystal structure of OxdA, and enzymological and physicochemical characterization, including spectroscopic analysis of the wild-type and mutant OxdAs [26–33], we clarified the full picture of the aldoxime dehydratase reaction mechanism, which is very unique and intriguing.

Among hemoproteins, myoglobin (Mb), which does not catalyze redox reactions primarily, has been reported to have the ability for the redox reactions [34–38]. However, such ability of aldoxime dehydratases (including OxdA) has never been reported previously. In the present study, we found that OxdA has three redox activities (catalase, peroxidase and peroxygenase). In the catalase reaction [39] and the chloroperoxidase reaction [40], an Asp residue located at the distal heme site of a mutant Mb [41] has been suggested to cause enhancement of the formation of a ferryl porphyrin cation radical (compound I) as a reaction intermediate [42, 43]. We investigated the three redox activities of two OxdA mutants in which the His320 corresponding to the Asp residue was mutated. (i) OxdA(H320D) (His320 being converted to Asp) was constructed to enhance the redox activities. (ii) OxdA (H320A) (H320 being converted to Ala), which has already been identified to exhibit no aldoxime dehydratase activity, was used to examine the effect of removal of charge of the 320th residue. All redox activities of OxdA (H320D) were higher than those of the wild-type OxdA and OxdA(H320A). Furthermore, the OxdA(H320D) yielded a new reaction product during the peroxygenase reaction.

## Materials and methods

### Materials

Standard chemicals were obtained from Tokyo Kasei Kogyo Co., Ltd. (Tokyo, Japan), Wako Pure Chemical Industries Co., Ltd. (Osaka, Japan), Sigma-Aldrich Corp., (St. Louis, MO, USA), and Nacalai Tesque Co., Ltd. (Kyoto, Japan).

### Site-directed mutagenesis

Site-directed mutagenesis (His320 being converted to Asp) was carried out on *oxdA* by means of an overlap extension PCR protocol [22, 44]. To construct OxdA(H320D), two PCRs, with plasmid pET-*oxdA* as the template, were performed with primer pairs H320D-S (5′ – CGGCTGTACGACGAGGTATCGGTCTCGGAC – 3′) plus T7T (5′ – AGAGGGATATCACTCAGCA TAAT – 3′), and T7P (5′ – TAATACGACTCACTATAGGGAGA – 3′) plus H320D-AS (5′ – GAT ACCTCGTCGTACAGCCGCAACTTTTTTC – 3′). These reactions produced 3′ and 5′ fragments of *oxdA*, respectively, whose sequences overlapped by 20 base pairs at the mutation. A second round of PCR was performed by mixing equimolar amounts of the first round products, followed by amplification between primers T7P and T7T to produce the full-length *oxdA*. The second-round product was digested with NdeI and SalI, ligated into expression vector pET-

24a(+), and then sequenced. The clone with the sequence for the desired His320 → Asp mutation [pET-*oxdA*(H320D)] or pET-*oxdA*(H320A) (ref) was transformed into *Escherichia coli* BL21-CodonPlus(DE3)-RIL. The recombinant cells were used for the overproduction and purification of the mutant OxdAs (H320D and H320A).

## Expression and purification of recombinant OxdA and its mutants

Recombinant OxdA and its mutants were overexpressed and purified in the same manner as described previously [28] with some modifications. All steps were performed at 0–4°C. Potassium phosphate buffer (KPB) (pH 7.0) was used throughout the purification. Centrifugation was carried out for 30 min at 15,000 × g.

The cells were harvested by centrifugation, washed twice with 100 mM buffer, and then disrupted by sonication (Insonator model 201M; Kubota, Tokyo, Japan) to prepare a cell-free extract. Cell debris was removed by centrifugation. The resulting supernatant was fractionated with ammonium sulfate (30–60% saturation), followed by dialysis against 10 mM buffer. The dialyzed solution was applied to a DEAE-Sephacel column (4 × 20 cm) (GE Healthcare UK Ltd., Bucks, UK) equilibrated with 10 mM buffer. Protein was eluted from the column with 1.0 liter of 10 mM buffer, the concentration of KCl being increased linearly from 0 to 0.5 M. Each fraction was analyzed by SDS-PAGE. The fractions, which contained the band (40 kDa) corresponding to OxdA or its mutants, were collected, and then ammonium sulfate was added to give 20% saturation. The enzyme solution was placed on a TSK gel Butyl-Toyopearl 650M column (4 × 15 cm) (Tosoh Co., Tokyo, Japan) equilibrated with 10 mM buffer 20% saturated with ammonium sulfate. The enzyme was eluted by lowering the concentration of ammonium sulfate (from 20 to 0%) in 1.0 liter of the same buffer. The active fractions were combined and then precipitated with ammonium sulfate at 70% saturation. The precipitate was collected by centrifugation, dissolved in 0.1 M buffer, and then dialyzed against three changes of 5 liters of 1 mM buffer (pH 7.0). After centrifugation, the enzyme solution was loaded onto a Cellulofine HAp column (4 × 5 cm) (Seikagaku Kogyo Co., Tokyo, Japan) equilibrated with 1 mM buffer (pH 7.0). The column was eluted with a linear gradient, 1–100 mM, of the buffer (pH 7.0). The resultant solution was dialyzed against 10 mM buffer (pH 7.0) and then centrifuged. The fractions, which contained OxdA or each of its mutants, were collected and concentrated by ultrafiltration using an Amicon YM-30 membrane (Millipore Corp., Bedford, MA, USA) and a Vivaspin 30,000 molecular weight cut-off PES membrane (Sartorius K.K., Tokyo, Japan). The enzyme solution was loaded onto a Superdex 200 column (1 × 30 cm) (GE Healthcare UK Ltd.) equilibrated with 50 mM buffer including 0.15 M KCl. The active fractions were collected. The homogeneity of the purified recombinant OxdAs (WT, H320D and H320A) was confirmed by SDS-PAGE.

## Enzyme assays

**Measurement of catalase activity.** In the case of standard assay A, enzyme activity was assayed by measuring the increase in O<sub>2</sub> with an oxygen electrode (Hansatech Instruments Ltd., Norfolk, UK), which monitored the O<sub>2</sub> concentration [40]. The reaction mixture was composed of various concentrations (10–400 mM) of H<sub>2</sub>O<sub>2</sub>, 100 mM KPB (pH 7.0), and an enzyme [2 μM OxdA(WT), 0.5 μM OxdA(H320D) or 1 μM OxdA(H320A)] in a final volume of 1 ml. The reaction was initiated by injecting the enzyme solution into an electrode cuvette and was carried out at 30°C. One unit of catalase activity was defined as the amount of enzyme that catalyzed the production of 0.5 μmol of O<sub>2</sub>/min (equal to the consumption of 1 μmol of H<sub>2</sub>O<sub>2</sub>/min) under the standard assay A conditions. Specific activity is expressed as units/mg

protein.  $k_{\text{cat}}$  values were calculated using  $V_{\text{max}}$  values and a  $M_r$  of 40,127 for OxdA. This assay was used to routinely measure catalase activity, unless otherwise noted.

**Measurement of peroxidase activity.** The standard assay B mixture comprised 100 mM KPB (pH 7.0), an excess (10–400 mM) of  $\text{H}_2\text{O}_2$  for enzymes, various concentrations (0.01–10 mM) of guaiacol, and an enzyme [1  $\mu\text{M}$  OxdA(WT), 0.25  $\mu\text{M}$  OxdA(H320D) or 1  $\mu\text{M}$  OxdA(H320A)] in a total volume of 100  $\mu\text{l}$ . The reaction was started by the addition of the enzyme and was carried out for 1 min at 30°C. The production of tetra-guaiacol, which is the reaction product, was determined from the increase in the absorbance at 470 nm [ $\epsilon$ ]  $3.8 \times 10^3 \text{ M}^{-1} \text{ cm}^{-1}$ ] [45]. One unit of peroxidase activity was defined as the amount of enzyme that catalyzed the production of 0.25  $\mu\text{mol}$  of tetra-guaiacol/min (equal to the consumption of 1  $\mu\text{mol}$  of  $\text{H}_2\text{O}_2$ /min) under the standard assay B conditions.

The standard assay C mixture comprised 100 mM KPB (pH 7.0), an excess (1–100 mM) of  $\text{H}_2\text{O}_2$  for enzymes, various concentrations (0.01–1 mM) of 2,2'-azino-bis (3-ethylbenzothiazoline-6-sulfonic acid ammonium salt) (ABTS), and an enzyme [1  $\mu\text{M}$  OxdA(WT), 0.25  $\mu\text{M}$  OxdA(H320D) or 1  $\mu\text{M}$  OxdA(H320A)] in a total volume of 100  $\mu\text{l}$ . The reaction was started by the addition of the enzyme and was carried out for 1 min at 30°C. The production of an ABTS radical, which is a reaction product, was determined from the increase in the absorbance at 430 nm [ $\epsilon$ ]  $1.4 \times 10^4 \text{ M}^{-1} \text{ cm}^{-1}$ ] [45]. One unit of peroxidase activity was defined as the amount of enzyme that catalyzed the production of 1  $\mu\text{mol}$  of ABTS radical/min (equal to the consumption of 1  $\mu\text{mol}$  of  $\text{H}_2\text{O}_2$ /min) under the standard assay C conditions. Specific activity is expressed as units/mg protein.  $k_{\text{cat}}$  values were calculated using  $V_{\text{max}}$  values and a  $M_r$  of 40,127 for OxdA.

**Measurement of peroxygenase activity.** The standard assay D mixture comprised 15% (v/v) ethanol, 100 mM KPB (pH 7.0), an excess (1–100 mM) of  $\text{H}_2\text{O}_2$  for enzymes, various concentrations (0.01–0.5 mM) of 1-methoxynaphthalene (1-MN), and an enzyme [1  $\mu\text{M}$  OxdA(WT) 0.25  $\mu\text{M}$  OxdA(H320D), or 1  $\mu\text{M}$  OxdA(H320A)] in a total volume of 100  $\mu\text{l}$ . The reaction was started by the addition of the enzyme and was carried out for 1 min at 30°C. The production of Russig's blue, which is a reaction product, was determined from the increase in the absorbance at 610 nm [ $\epsilon$ ]  $1.45 \times 10^4 \text{ M}^{-1} \text{ cm}^{-1}$ ] [46, 47]. One unit of peroxygenase activity was defined as the amount of enzyme that catalyzed the consumption of 0.25  $\mu\text{mol}$  of Russig's blue/min (equal to the consumption of 1  $\mu\text{mol}$  of  $\text{H}_2\text{O}_2$ /min) under the standard assay D conditions. As for OxdA(H320D), the production of 1-methoxy-2-naphthalenol (described latter), which is a reaction product, was determined from the increase in the absorbance at 334 nm [ $\epsilon$ ]  $4.76 \times 10^3 \text{ M}^{-1} \text{ cm}^{-1}$ ], which was determined for purified 1-methoxy-2-naphthalenol in this study. One unit of peroxygenase activity was defined as the amount of enzyme that catalyzed the consumption of 1  $\mu\text{mol}$  of 1-methoxy-2-naphthalenol/min (equal to the consumption of 1  $\mu\text{mol}$  of  $\text{H}_2\text{O}_2$ /min) under the standard assay D conditions. Specific activity is expressed as units/mg protein.  $k_{\text{cat}}$  values were calculated using  $V_{\text{max}}$  values and a  $M_r$  of 40,127 for OxdA.

**Spectral measurements.** The UV-Vis spectroscopy measurements were carried out using a UV-1700 (Shimadzu Co., Kyoto, Japan). The reaction mixture was composed of 100 mM KPB (pH 7.0), 1 mM  $\text{H}_2\text{O}_2$ , 0.5 mM 1-MN and 0.5  $\mu\text{M}$  enzyme. For measurements, the reaction was started by the addition of the enzyme, and the mixed reaction solutions were introduced into the optical cell, and absorption measurements were started at 28°C.

## HPLC and LC/MS analyses

A sample was analyzed by HPLC with a Shimadzu Prominence system including a photodiode array detector (SPD-M20A), and an LCMS-8030 (Shimadzu Co.) equipped with a Kinetex

1.7  $\mu\text{m}$  C18 100 $\text{\AA}$  column (2.1  $\times$  50 mm; Phenomenex Co., Ltd., LA, USA). The HPLC conditions were as follows: flow rate, 0.4 ml/min; solvent A, 0.1% (v/v) HCOOH; and solvent B, acetonitrile. After column equilibration with 10% solvent B, a linear gradient system of solvent B, 10% to 100%, was applied over 5 min, followed by 100% solvent B for 3 min.

### Purification and NMR analysis of the peroxygenase reaction product with OxdA(H320D)

After the peroxygenase reaction with OxdA(H320D) at 25°C for 30 min, the reaction mixture was extracted with ethyl acetate and concentrated by evaporation. The reaction product dissolved in water was further purified by HPLC [TSK-gel ODS-80Ts (7.8 by 300 mm; Tosoh Co.), with a linear gradient of 10~100% (v/v) acetonitrile in water]. The peak fractions were collected and concentrated to dryness (0.742 mg). Nuclear magnetic resonance (NMR) spectra of the product dissolved in  $\text{CDCl}_3$  were measured with an AVANCE-600 NMR spectrometer (Bruker, Ettlingen, Germany), and calibrated with  $\text{CDCl}_3$ .

### Measurement of reduction potentials of OxdAs (WT, H320A and H320D)

The reduction potentials of OxdAs (WT, H320A and H320D) were evaluated by cyclic voltammetry. A gold electrode (polycrystalline Au, 3 mm in diameter; ALS Co., Ltd, Tokyo, Japan) was used as a working electrode. The surface of the gold electrode was polished with an alumina slurry (0.3  $\mu\text{m}$ ), sonicated and rinsed with distilled water. Cyclic voltammetry was carried out on an electrochemical analyzer (CHI 611A, ALS Co., Ltd.). The measurements were carried out in 100 mM KPB (pH 7.0) in the presence and absence of an enzyme (10  $\mu\text{M}$ ) at a scan rate of 5 mV/s and room temperature (25  $\pm$  1°C). Prior to each experiment, the solutions were bubbled with argon gas for 10 min. A platinum wire counter electrode and an Ag|AgCl|KCl (sat.) reference electrode were used.

### Analytical methods

SDS-PAGE was performed in a 12% polyacrylamide slab gel according to Laemmli [48]. The gel was stained with Coomassie brilliant blue R-250. The molecular mass of the subunit of the mutant enzyme was determined from the relative mobilities of marker proteins, phosphor-ylase *b* (94 kDa), bovine serum albumin (67 kDa), ovalbumin (43 kDa), carbonic anhydrase (30 kDa), soybean trypsin inhibitor (20.1 kDa), and  $\alpha$ -lactalbumin (14.4 kDa).

## Results

### Detection of catalase activity of OxdAs (WT, H320D and H320A)

OxdA catalyzes the dehydration of aldoximes to the corresponding nitriles, but not redox reactions. First, we examined the catalase activity of OxdA by observing the increase in  $\text{O}_2$  by using an oxygen electrode. In the reaction mixture containing 10 mM  $\text{H}_2\text{O}_2$  and 2  $\mu\text{M}$  OxdA, the production of  $\text{O}_2$  (S1A Fig) was detected. On the other hand, an increase in  $\text{O}_2$  was not detected in the reaction mixture containing heat-treated OxdA (for 10 min at 98°C), which did not give the specific absorption peak of heme (S2A Fig). These findings for the first time indicated that OxdA catalyzes a catalase reaction. Then, we determined the Michaelis—Menten kinetics of the activity at the following concentrations of  $\text{H}_2\text{O}_2$  (10–100 mM) (Fig 1A). The apparent  $K_m$  and  $V_{\text{max}}$  values of OxdA were found by means of Hanes-Woolf plots (S3A Fig) to be 22  $\pm$  4 mM and 1.9  $\pm$  0.1 units/mg, respectively (Table 1).

We constructed a mutant OxdA (His320 being converted to Asp), OxdA(H320D), to mimic the chloroperoxidase (CPO) from fungus *Caldariomyces fumago* [41, 43]. In the

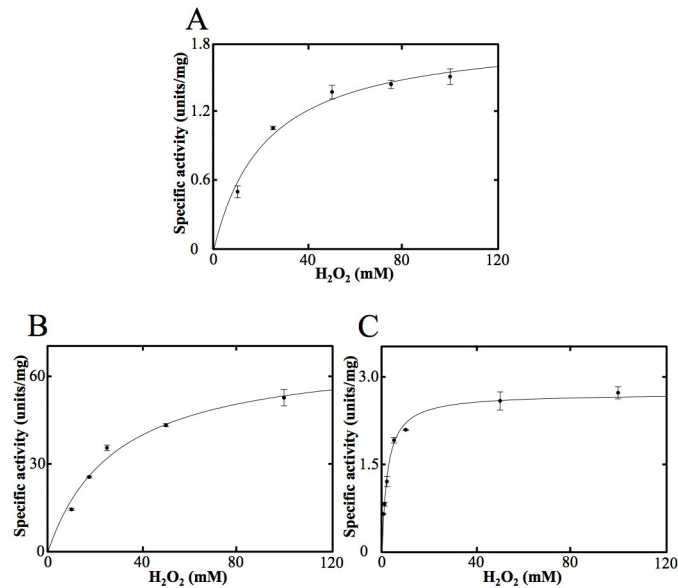

**Fig 1. Michaelis–Menten kinetics of the catalase activity of OxdAs.** The reactions were carried out under the “standard assay A” conditions as described under “Materials and Methods.” For all data points, values are means ± mean error. OxdA(WT) (A), OxdA(H320D) (B) and OxdA(H320A) (C).

<https://doi.org/10.1371/journal.pone.0175846.g001>

chloroperoxidase reaction and the catalase reaction [41], the Asp residue located in the distal site of heme of the His64 → Asp myoglobin mutant mimicking CPO [39, 40] has been suggested to enhance the formation of a ferryl porphyrin cation radical (compound I) as a reaction intermediate in the catalase reaction. In addition, to examine the effect of removal of the charge of the 320th residue, we used the other mutant OxdA (His320 being converted to Ala), OxdA(H320A) (29).

We measured the catalase activity of mutant OxdAs (H320D and H320A), and found that both mutant enzymes (H320D and H320A) also catalyzed a catalase reaction (S1B and S1C Fig), whereas heat-treated ones (for 10 min at 98 °C) not exhibiting the specific absorption peak of heme (S2B and S2C Fig) catalyzed no catalase reaction. Their kinetic parameters were determined by means of Hanes-Woolf plots (S3B and S3C Fig) at the following concentrations of H<sub>2</sub>O<sub>2</sub>, 10–100 mM (Fig 1B and 1C). The kinetic parameters of OxdA(H320D) were found to be  $K_m$  value  $29 \pm 4$  mM and  $V_{max}$  value  $69 \pm 4$  units/mg, and those of OxdA(H320A) to be  $K_m$  value  $2.3 \pm 0.2$  mM and  $V_{max}$  value  $2.7 \pm 0.1$  units/mg (Table 1). These findings demonstrate that the  $V_{max}$  value ( $69 \pm 4$  units/mg) of OxdA(H320D) was about 30 times higher than those of the wild-type OxdA [namely, OxdA(WT)] (units/mg) and OxdA(H320A) ( $1.9 \pm 0.1$  and  $2.7 \pm 0.1$  units/mg), respectively, while the  $K_m$  value ( $2.3 \pm 0.2$  mM) of OxdA(H320A) for

**Table 1. Catalase activity of OxdAs (WT, H320D and H320A).**

| Enzyme      | $K_m$ (mM)    | $V_{max}$ (units/mg) | $k_{cat}$ (s <sup>-1</sup> ) | $k_{cat}/K_m$ (s <sup>-1</sup> mM <sup>-1</sup> ) |
|-------------|---------------|----------------------|------------------------------|---------------------------------------------------|
| OxdA(WT)    | $22 \pm 4$    | $1.9 \pm 0.1$        | $1.3 \pm 0.1$                | 0.057                                             |
| OxdA(H320D) | $29 \pm 4$    | $69 \pm 4$           | $46 \pm 3$                   | 1.6                                               |
| OxdA(H320A) | $2.3 \pm 0.2$ | $2.7 \pm 0.1$        | $1.8 \pm 0.0$                | 0.80                                              |

The reaction was carried out using “standard assay A” described under “Materials and Methods.” Apparent  $K_m$  values of OxdAs (WT, H320D and H320A) for H<sub>2</sub>O<sub>2</sub>, and their apparent  $V_{max}$  values were obtained from Hanes-Woolf plots.  $k_{cat}$  values were calculated using  $V_{max}$  values and a  $M_i$  of 40,127 for OxdA.

<https://doi.org/10.1371/journal.pone.0175846.t001>

H<sub>2</sub>O<sub>2</sub> was about 10 times lower than those of OxdA(WT) and OxdA(H320D) (22 ± 4 and 29 ± 4 mM), respectively.

### Detection of peroxidase activity of OxdAs (WT, H320D and H320A)

Next, we examined the peroxidase activity (SH<sub>2</sub> + H<sub>2</sub>O<sub>2</sub> → S + 2H<sub>2</sub>O) of the OxdAs (WT, H320D and H320A), which is one of the redox activities. For the peroxidase assay, two different substrates were used.

(i) We measured the peroxidase activity of OxdA(WT) using guaiacol as a substrate. In the reaction mixture containing 25 mM H<sub>2</sub>O<sub>2</sub>, 10 mM guaiacol and 1 μM OxdA under the standard assay B conditions, an increase in absorbance at 470 nm, which is the absorption maximum for a reaction product (tetra-guaiacol) [45], was observed (S4A Fig). On the other hand, this increase was not observed on the addition of heat-treated OxdA (for 10 min at 98°C). These findings, for the first time, indicated that OxdA catalyzes a peroxidase reaction. In the case of OxdA, the peroxidase activity would be strongly influenced by its catalase activity. Furthermore, a large amount of H<sub>2</sub>O<sub>2</sub> present in the reaction mixture would generally inhibit various enzymatic activities due to its strong oxidizing power [49]. Thus, we measured each peroxidase activity in a reaction mixture containing various concentrations of H<sub>2</sub>O<sub>2</sub> (10–400 mM) and excess guaiacol (10 mM) [Fig 2A(a)]. The peroxidase activity was inhibited by H<sub>2</sub>O<sub>2</sub> in excess of 200 mM [Fig 2A(a)], indicating that 100 mM H<sub>2</sub>O<sub>2</sub> is suitable for measurement of the peroxidase activity. The tendency of H<sub>2</sub>O<sub>2</sub> concentration-dependent inhibition of the peroxidase activity was similar to that of the catalase activity (S5 Fig). These inhibitions would be caused by the inactivation of OxdA due to the strong oxidizing power of H<sub>2</sub>O<sub>2</sub>. Therefore, we determined the Michaelis–Menten kinetics of the peroxidase activity in a reaction mixture containing 100 mM H<sub>2</sub>O<sub>2</sub> [Fig 2B(a)]. The apparent  $K_m$  value for guaiacol and the  $V_{max}$  value of OxdA were found by means of Hanes-Woolf plots (S6A Fig) to be 0.026 ± 0.010 mM and 20 ± 2 units/mg, respectively (Table 2). Moreover, we found that a peroxidase reaction was catalyzed by the mutant OxdAs (H320D and H320A) (S4 and S4C Fig), but not by the heat-treated ones (for 10 min at 98°C). We determined the suitable concentrations of H<sub>2</sub>O<sub>2</sub> of mutant OxdAs (H320D and H320A) to be 100 and 25 mM for the peroxidase assay (Fig 2A), respectively. The kinetic parameters of mutant OxdAs (H320D and H320A) were determined by means of Hanes-Woolf plots (S6 and S6C Fig) to be  $K_m$  values for guaiacol 1.0 ± 0.4 and 0.84 ± 0.17 mM, and  $V_{max}$  values 50 ± 5 and 1.2 ± 0.1 units/mg [Fig 2B(b) and 2B(c)] (Table 2), respectively. These findings demonstrated that the  $V_{max}$  value (50 ± 5 units/mg) of OxdA(H320D) was about 2.5 times higher than that (20 ± 2 units/mg) of OxdA(WT), however, the  $V_{max}$  value (1.2 ± 0.1 units/mg) of OxdA(H320A) was about 20 times lower than that (20 ± 2 units/mg) of OxdA(WT). On the other hand, the  $K_m$  values (1.0 ± 0.4 and 0.84 ± 0.17 mM) of mutant OxdAs (H320D and H320A) for guaiacol were dozens of times lower than that (0.026 ± 0.010 mM) of OxdA(WT).

(ii) Instead of guaiacol, 2,2'-azino-bis (3-ethylbenzothiazoline-6-sulfonic acid ammonium salt) (ABTS) was used as a substrate. With the reaction mixture consisting of 25 mM H<sub>2</sub>O<sub>2</sub>, 2.5 mM ABTS and 1 μM OxdA(WT) under the standard assay C conditions (S7 Fig), we observed an increase in the absorbance at 430 nm due to the absorption maximum for a peroxidase reaction product (ABTS radical) [45]. As for the peroxidase assay with guaiacol as a substrate, the peroxidase activity in the reaction mixture containing various concentrations of H<sub>2</sub>O<sub>2</sub> (1–100 mM) and excess ABTS (2.5 mM) for OxdA was measured [Fig 3A(a)]. Even with 100 mM H<sub>2</sub>O<sub>2</sub>, surprisingly, the peroxidase activity using ABTS as a substrate was inhibited, indicating the suitable concentration of H<sub>2</sub>O<sub>2</sub> was 25 mM for the assay. The tendency of H<sub>2</sub>O<sub>2</sub> concentration-dependent inhibition was different from those for the catalase

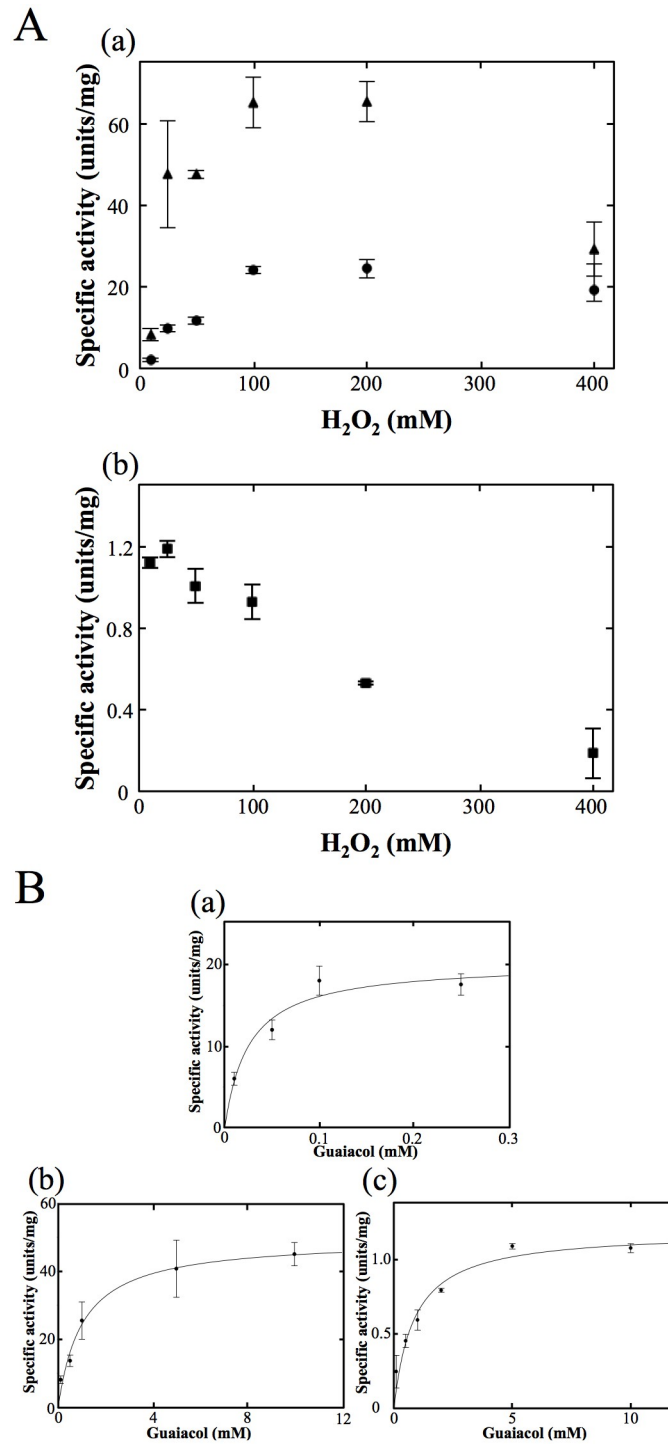

**Fig 2. Analyses of peroxidase activities of OxdAs in the presence of guaiacol.** (A) The peroxidase activities of OxdAs depending on the H<sub>2</sub>O<sub>2</sub> concentration. OxdA(WT) [(a) black circles], OxdA(H320D) [(a) black triangles], and OxdA(H320A) [(b) black square]. (B) Michaelis—Menten kinetics of the peroxidase activity of OxdAs. OxdA(WT) (a), OxdA(H320D) (b) and OxdA(H320A) (c). The reactions with guaiacol as a substrate were carried out under the “standard assay B” conditions as described under “Materials and Methods.” For all data points, values are means ± mean error.

<https://doi.org/10.1371/journal.pone.0175846.g002>



**Table 2. Peroxidase activity of OxdAs using guaiacol as a substrate.**

| Enzyme      | $K_m$ (mM)        | $V_{max}$ (units/mg) | $k_{cat}$ ( $s^{-1}$ ) | $k_{cat}/K_m$ ( $s^{-1} mM^{-1}$ ) |
|-------------|-------------------|----------------------|------------------------|------------------------------------|
| OxdA(WT)    | $0.026 \pm 0.010$ | $20 \pm 2$           | $14 \pm 1$             | 530                                |
| OxdA(H320D) | $1.0 \pm 0.4$     | $50 \pm 5$           | $33 \pm 3$             | 32                                 |
| OxdA(H320A) | $0.84 \pm 0.17$   | $1.2 \pm 0.1$        | $0.81 \pm 0.05$        | 0.97                               |

The reaction was carried out using “standard assay B” described under “Materials and Methods.” Apparent  $K_m$  values of OxdAs (WT, H320D and H320A) for guaiacol and their apparent  $V_{max}$  values were obtained from Hanes-Woolf plots.  $k_{cat}$  values were calculated using  $V_{max}$  values and a  $M_r$  of 40,127 for OxdA.

<https://doi.org/10.1371/journal.pone.0175846.t002>

(S5 Fig) and peroxidase (using guaiacol as a substrate) (Fig 2A) reactions. Inhibition of the peroxidase activity (using ABTS as a substrate) by a low concentration of  $H_2O_2$  would be caused by competition between the catalase and peroxidase activities (for further details, please refer to “Discussion”). On determination of the Michaelis–Menten kinetics of the activity in the reaction mixture containing 25 mM  $H_2O_2$  [Fig 3B(a)], the apparent  $K_m$  for ABTS and  $V_{max}$  values of OxdA(WT) were found by means of Hanes-Woolf plots (S8A Fig) to be  $0.21 \pm 0.04$  mM and  $3.4 \pm 0.2$  units/mg, respectively (Table 3). Furthermore, we succeeded in the detection of peroxidase activity of mutant OxdAs (H320D and H320A) (S7 Fig). The suitable concentrations of  $H_2O_2$  for OxdAs (H320D and H320A) were determined to be 25 and 10 mM for the peroxidase assay (Fig 3A), respectively, and the kinetic parameters were determined by means of Hanes-Woolf plots (S8 and S8C Fig) to be  $K_m$  values  $0.12 \pm 0.02$  and  $0.21 \pm 0.03$  mM for ABTS, and  $V_{max}$  values  $33 \pm 2$  and  $1.3 \pm 0.1$  units/mg, respectively [Fig 3B(b) and 3Bc] (Table 3). These findings demonstrated that the  $V_{max}$  value ( $33 \pm 2$  units/mg) of OxdA(H320D) was about 10 times higher than that ( $3.4 \pm 0.2$  units/mg) of OxdA(WT), while that of OxdA(H320A) ( $1.3 \pm 0.1$  units/mg) was about 3 times lower than that of OxdAs (WT). On the other hand, the  $K_m$  value ( $0.12 \pm 0.02$  mM) of OxdA (H320D) for ABTS was nearly half of those ( $0.21 \pm 0.04$  and  $0.21 \pm 0.03$  mM) of OxdAs (WT and H320A).

### Detection of peroxygenase activity of OxdA(WT)

Next, we examined peroxygenase activity ( $S + H_2O_2 \rightarrow SO + H_2O$ ) of OxdAs (WT, H320D and H320A) in order to discover a third redox activity. To measure peroxygenase activity, we used 1-methoxynaphthalene (1-MN) as a substrate, and measured the absorbance at 610 nm due to the absorption maximum of the reaction product (Russig’s blue) [46, 47] [Fig 4A(a)]. In the reaction mixture containing 5 mM  $H_2O_2$ , 0.5 mM 1-MN and 1  $\mu$ M OxdA, the marked production of Russig’s blue was observed under the standard assay D conditions (S9 Fig). With the use of heat-treated OxdA (for 10 min at 98°C), however, this increase in absorbance at 610 nm was not observed. These findings for the first time indicated that OxdA catalyzes a peroxygenase reaction. As for the peroxidase assays, we determined the suitable amount of  $H_2O_2$  to be 5 mM for the assay (Fig 4B), by measuring each peroxygenase activity in the reaction mixture containing various concentrations of  $H_2O_2$  (1–100 mM) and 0.5 mM 1-MN, this concentration giving near saturation. The suitable  $H_2O_2$  concentration was different from those of the catalase and peroxidase activities (for further details, please refer to “Discussion”). The Michaelis–Menten kinetics of the activity were determined with a suitable concentration of  $H_2O_2$  [Fig 4C(a)]. The apparent  $K_m$  for 1-MN and  $V_{max}$  values of OxdA(WT) were found by means of Hanes-Woolf plots (S10A Fig) to be  $0.070 \pm 0.017$  mM and  $0.77 \pm 0.06$  units/mg, respectively (Table 4).

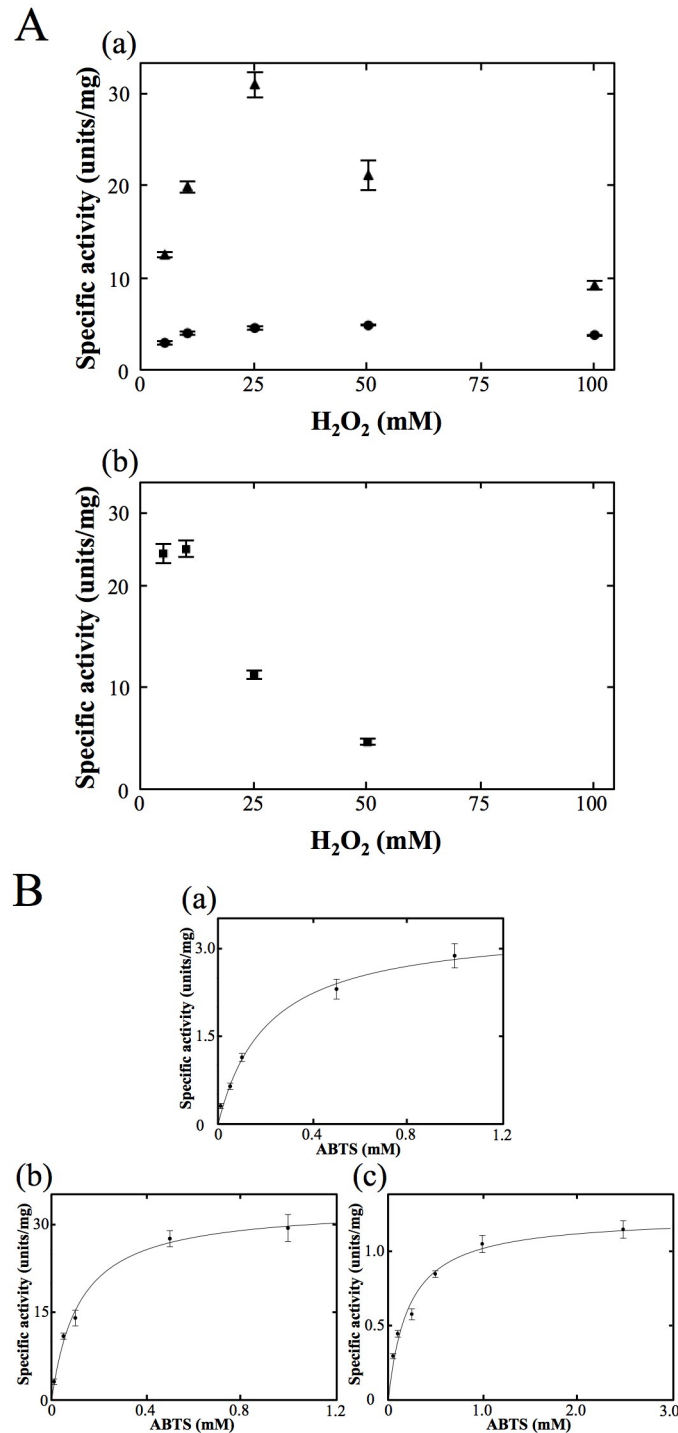

**Fig 3. Analyses of peroxidase activities of OxdAs in the presence of ABTS.** (A) The peroxidase activities of OxdAs depending on the H<sub>2</sub>O<sub>2</sub> concentration. OxdA(WT) [(a) black circles], OxdA(H320D) [(a) black triangles], and OxdA(H320A) [(b) black square]. (B) Michaelis—Menten kinetics of the peroxidase activity of OxdAs. OxdA(WT) (a), OxdA(H320D) (b) and OxdA(H320A) (c). The reactions with ABTS as a substrate were carried out under the “standard assay C” conditions as described under “Materials and Methods.” For all data points, values are means ± mean error.

<https://doi.org/10.1371/journal.pone.0175846.g003>

**Table 3. Peroxidase activity of OxdAs using ABTS as a substrate.**

| Enzyme      | $K_m$ (mM)      | $V_{max}$ (units/mg) | $k_{cat}$ ( $s^{-1}$ ) | $k_{cat}/K_m$ ( $s^{-1} mM^{-1}$ ) |
|-------------|-----------------|----------------------|------------------------|------------------------------------|
| OxdA(WT)    | $0.21 \pm 0.04$ | $3.4 \pm 0.2$        | $2.3 \pm 0.1$          | 11                                 |
| OxdA(H320D) | $0.12 \pm 0.02$ | $33 \pm 2$           | $22 \pm 1$             | 190                                |
| OxdA(H320A) | $0.21 \pm 0.03$ | $1.3 \pm 0.1$        | $0.85 \pm 0.07$        | 4.0                                |

The reaction was carried out using “standard assay C” described under “Materials and Methods.” Apparent  $K_m$  values of OxdAs (WT, H320D and H320A) for ABTS and their apparent  $V_{max}$  values were obtained from Hanes-Woolf plots.  $k_{cat}$  values were calculated using  $V_{max}$  values and a  $M_r$  of 40,127 for OxdA.

<https://doi.org/10.1371/journal.pone.0175846.t003>

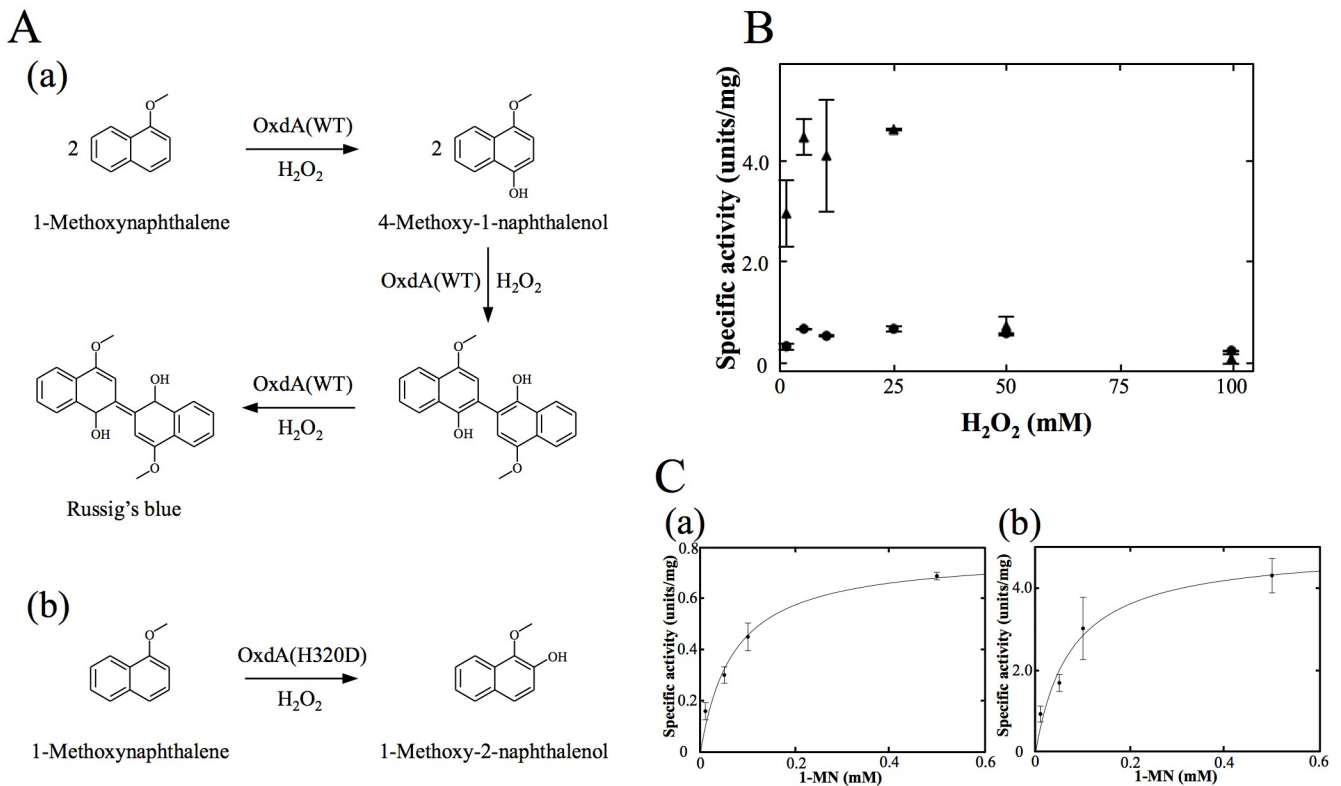

**Fig 4. The reaction pathways and analyses of peroxxygenase activities of OxdAs using 1-MN as a substrate.** (A) Reaction pathway for conversion of 1-MN to Russig's blue (a), and 1-methoxy 2-naphthalenol (b). (B) The peroxxygenase activities of OxdAs depending on the H<sub>2</sub>O<sub>2</sub> concentration. OxdA(WT) (black circles) and OxdA(H320D) (black triangles). (C) Michaelis—Menten kinetics of the peroxxygenase activity of OxdAs. OxdA(WT) (a) and OxdA(H320D) (b). The reactions were carried out under the “standard assay D” conditions as described under “Materials and Methods.” For all data points, values are means  $\pm$  mean error.

<https://doi.org/10.1371/journal.pone.0175846.g004>

**Table 4. Peroxxygenase activity of OxdAs (WT and H320D).**

| Enzyme      | $K_m$ (mM)        | $V_{max}$ (units/mg) | $k_{cat}$ ( $s^{-1}$ ) | $k_{cat}/K_m$ ( $s^{-1} mM^{-1}$ ) |
|-------------|-------------------|----------------------|------------------------|------------------------------------|
| OxdA(WT)    | $0.070 \pm 0.017$ | $0.77 \pm 0.06$      | $0.52 \pm 0.04$        | 7.4                                |
| OxdA(H320D) | $0.075 \pm 0.030$ | $5.0 \pm 0.7$        | $3.3 \pm 0.4$          | 44                                 |

The reaction was carried out using “standard assay D” described under “Materials and Methods.” Apparent  $K_m$  values of OxdAs (WT and H320D) for 1-MN and their apparent  $V_{max}$  values were obtained from Hanes-Woolf plots.  $k_{cat}$  values were calculated using  $V_{max}$  values and a  $M_r$  of 40,127 for OxdA

<https://doi.org/10.1371/journal.pone.0175846.t004>

## Unexpected peroxygenase reaction of OxdAs (H320D and H320A)

For OxdA(H320D), we also measured its peroxygenase activity under the standard assay D conditions. In the reaction mixture containing OxdA(H320D), we found that Russig's blue was not produced, but that a different compound was, based on the characteristic color of the reaction mixture [Figs 5 and 6A(a)]. Therefore, we purified the new reaction product by HPLC (Fig 6B), and measured its mass spectrum by LC/MS as described under "Materials and Methods." The major mass peak derived from the purified product was found at  $m/z$  173 in the negative ion mode (Fig 6C). These findings demonstrated that the molecular mass of the new reaction product is 174. Furthermore, NMR spectra of the purified product were measured [ $^1\text{H-NMR}$  (600 MHz,  $\text{CDCl}_3$ ):  $\delta$  8.30 (m, 1H, H-8), 7.84 (m, 1H, H-5), 7.52 (m, 1H, H-6 and 7), 7.48 (d, 1H,  $J = 11.8$  Hz, H-4), 7.44 (t, 1H,  $J = 22.1$  Hz, H-3), 6.85 (d, 1H,  $J = 7.44$  Hz, H-2), 4.00 (s, 3H, O- $\text{CH}_3$ );  $^{13}\text{C-NMR}$  (150 MHz,  $\text{CDCl}_3$ ):  $\delta$  145.0 (C-2), 139.0 (C-1), 129.6 (C-4a), 128.3 (C-5), 127.8 (C-8a), 126.3 (C-7), 125.3 (C-4), 123.5 (C-6), 120.3 (C-8), 117.4 (C-3), 61.7 (O- $\text{CH}_3$ )] (Fig 6D–6F). Based on these findings, the new product of the peroxygenase reaction with OxdA(H320D) was identified as 1-methoxy-2-naphthalenol.

Next, we measured the absorption spectrum of the purified product (0.05 mM) [Fig 6A(b)], and then determined the molar extinction coefficients of 1-methoxy-2-naphthalenol at 280 nm ( $9.38 \times 10^3 \text{ M}^{-1}\text{cm}^{-1}$ ) and 334 nm ( $4.76 \times 10^3 \text{ M}^{-1}\text{cm}^{-1}$ ). By use of the latter coefficient value, we measured the peroxygenase activity of OxdA(H320D) using the increase in the absorbance at 334 nm, which does not overlap the absorption at 280 nm for various proteins including OxdA, under the standard assay D conditions. As for the peroxidase assays, we observed each peroxygenase activity in the reaction mixture containing various concentrations of  $\text{H}_2\text{O}_2$  (1–100 mM) and 0.5 mM 1-MN, this concentration giving near saturation, and revealed that the suitable concentration of  $\text{H}_2\text{O}_2$  was 5 mM for the assay (Fig 4B). The determined suitable  $\text{H}_2\text{O}_2$  concentration was different from those of the catalase and peroxidase activities (for further details, please refer to "Discussion"). With the suitable concentration of

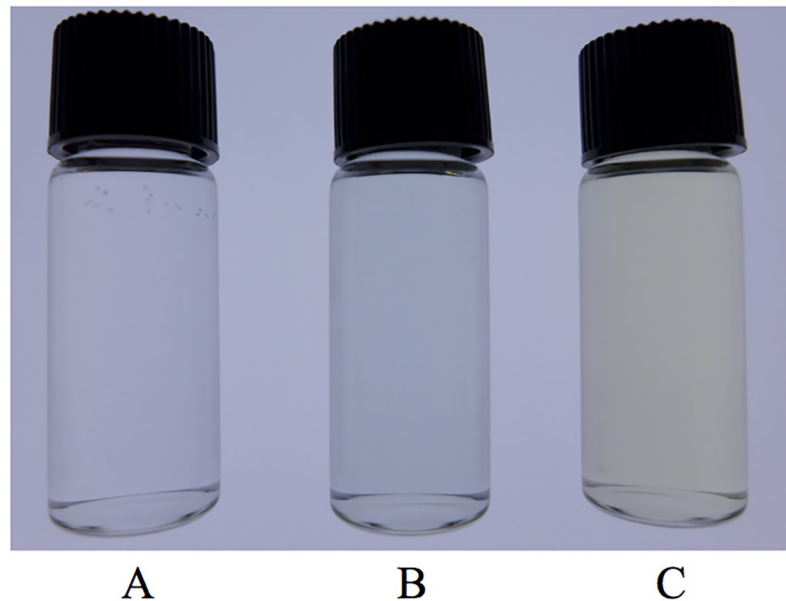

**Fig 5. Photograph of the peroxygenase reaction mixtures containing OxdA(WT) and OxdA(H320D).** The reaction mixture containing 0.5 mM 1-MN and 5 mM  $\text{H}_2\text{O}_2$  in the absence of an enzyme (A), 10  $\mu\text{M}$  OxdA (WT) (B), or OxdA(H320D) (C) at pH 7.0 and 28°C after mixing at 15 min.

<https://doi.org/10.1371/journal.pone.0175846.g005>

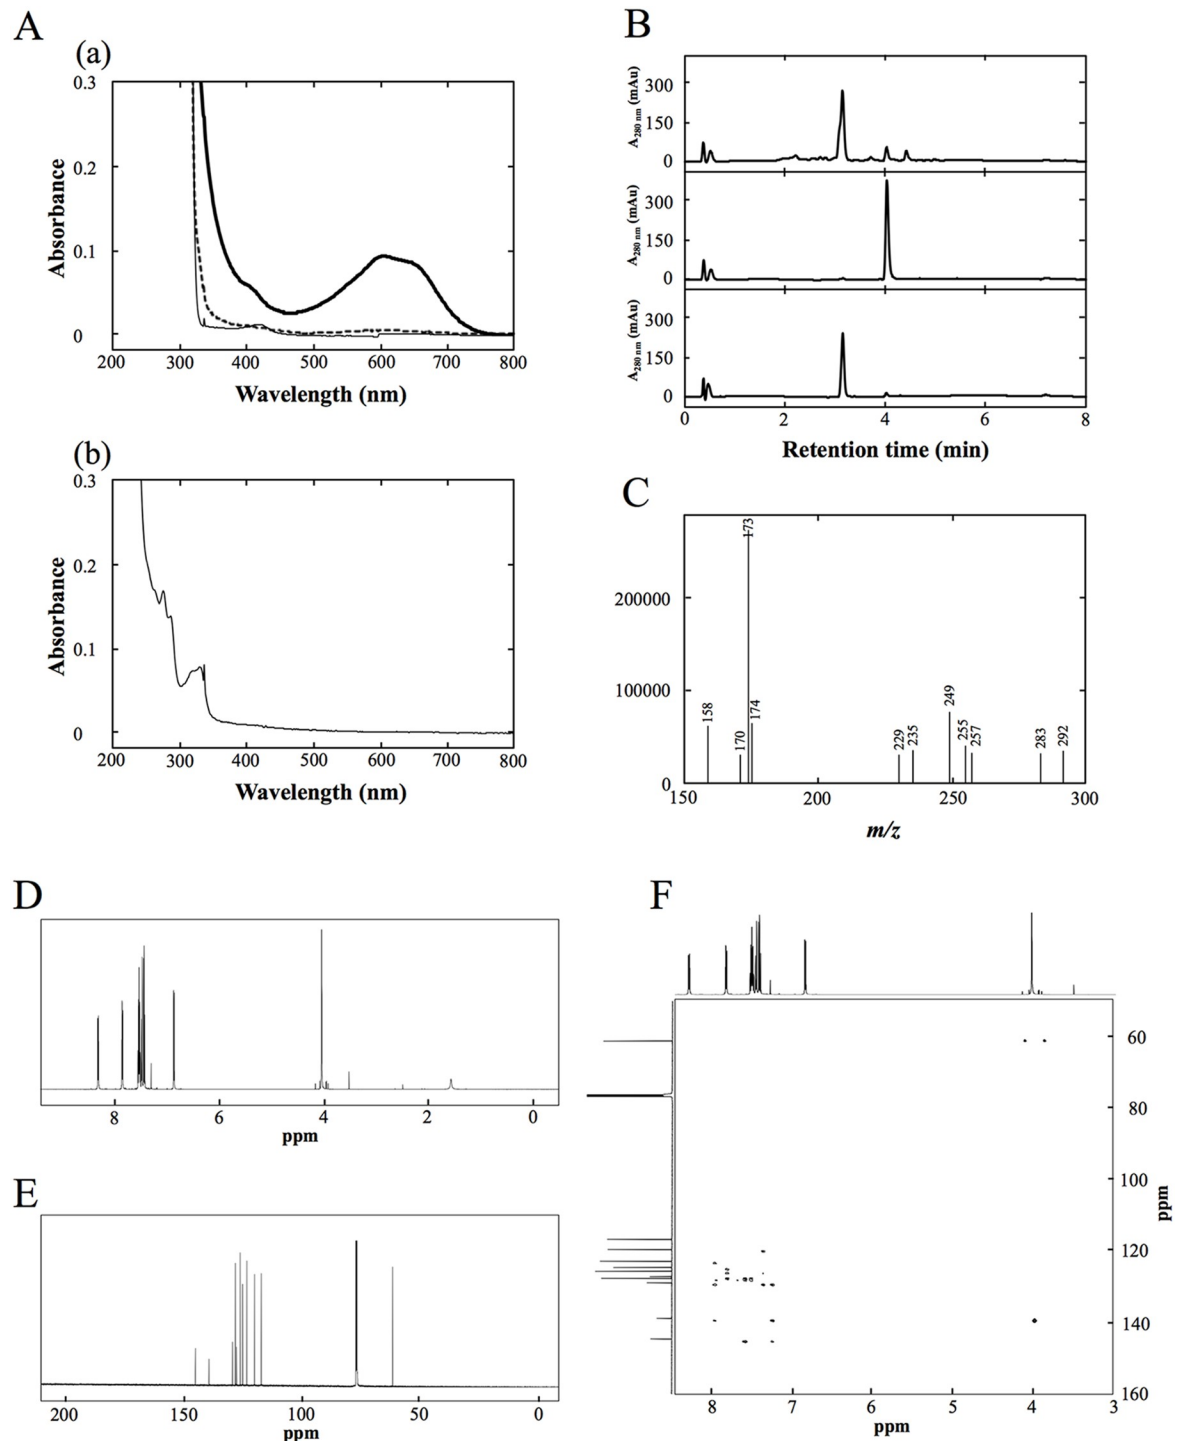

**Fig 6. Absorption spectroscopy, HPLC, LC/MS and NMR analyses of the purified product.** (A) (a) Absorption spectra of reaction mixture containing 0.5 mM 1-MN, 5 mM H<sub>2</sub>O<sub>2</sub> and 1 μM OxdA(WT) (thick line), OxdA(H320D) (broken line), or OxdA(H320A) (thin line) at pH 7.0 and 28 °C after mixing at 10 min. (b) Absorption spectrum of the purified 1-methoxy-2-naphthalenol in an ethanol solution (0.05 mM). (B) HPLC elution profiles of a chloroform extract of the reaction mixture containing 1-MN and OxdA(H320D) (Top), a chloroform extract of the reaction mixture containing 1-MN and heat-treated OxdA(H320D) (Middle), and the purified reaction product (Bottom). (C) The mass spectrum on LC-ESI-MS in the negative ion mode of the peak of the purified new product. The major mass peak at *m/z* 173 corresponds to [M-H]<sup>-</sup> of 1-methoxy-2-naphthalenol. (D) <sup>1</sup>H NMR spectrum of purified product. (E) <sup>13</sup>C NMR spectrum of the purified product. (F) HMBC spectrum of the purified product. The experimental procedures were carried out by the methods described under "Materials and Methods."

<https://doi.org/10.1371/journal.pone.0175846.g006>

H<sub>2</sub>O<sub>2</sub>, we determined the kinetic parameters of OxdA(H320D) by means of Hanes-Woolf plots (S10B Fig) to be  $K_m$  value  $0.075 \pm 0.030$  mM for 1-MN and  $V_{max}$  value  $5.0 \pm 0.7$  units/mg [Fig 4C(b)] (Table 4). These findings demonstrated that the  $V_{max}$  value ( $5.0 \pm 0.7$  units/mg) of OxdA(H320D) was about 6 times higher than that ( $0.77 \pm 0.06$  units/mg) of OxdA(WT), while the  $K_m$  value ( $0.075 \pm 0.030$  mM) of OxdA(H320D) for 1-MN was similar to that ( $0.070 \pm 0.017$  mM) of OxdA(WT).

Finally, we measured the peroxygenase activity of OxdA(H320A) by observing the increase in absorbance at 610 nm (Russig's blue) and 334 nm (1-methoxy-2-naphthalenol) in the reaction mixture containing 5 mM H<sub>2</sub>O<sub>2</sub> and 0.5 mM 1-MN and 1  $\mu$ M OxdA(H320A), but both values did not increase (S9 and S11 Figs). Even if a 10-fold higher amount (10  $\mu$ M) of OxdA(H320A) was added, no increase in either value was observed. Furthermore, we carried out the absorption spectrum analysis of the peroxygenase reaction mixture of OxdA(H320A) [Fig 6A(a)]. However, no specific peak derived from another product was observed. These findings suggested that OxdA(H320A) did not catalyze the peroxygenase reaction using 1-MN as a substrate under the conditions tested.

## Evaluation of reduction potential of OxdAs

The reduction potentials of OxdA(WT) and its mutants were evaluated by cyclic voltammetry, which has often been used to determine the formal potential of several redox proteins. A reduction current was observed on each enzyme, as shown in Fig 7. Such peaks were not observed in the absence of the enzyme, so the reduction currents must be derived from a redox site in OxdA (most probably the protoheme site). The onset potentials, where the reduction wave begins to increase, of OxdAs (WT, H320D, and H320A) were 0.28, 0.40, and 0.28 V vs SHE, respectively.

## Discussion

### Discovery of redox activities of OxdA

Among heme enzymes, OxdA performs the uncommon catalysis of a dehydration reaction. In general, heme enzymes, which commonly catalyze redox reactions, and hemoproteins bind to an exogenous small gaseous molecule (e.g., O<sub>2</sub>, CO<sub>2</sub> or H<sub>2</sub>O<sub>2</sub>) on the heme. On the contrary, OxdA directly binds to and activates an organic substrate on the heme in the dehydration reaction [28]. In our previous studies, we clarified various characteristics of OxdA [28–31] and elucidated the overall catalytic mechanism [32]. The present proposed reaction mechanism of OxdA for the synthesis of a nitrile is as follows: (i) the Ser219 residue would fix the substrate (aldoxime) and increase the basicity of the hydroxyl group of the substrate; (ii) the His320 residue acts as an acid-base catalyst; (iii) the Arg178 residue would act a proton donor-acceptor of the imidazole ring of His320; and (iv) the heme iron acts as an electron donor-acceptor (S12A Fig) [30, 32, 50]. However, redox catalysis of OxdA has never been reported. Here, we at first examined the ability of OxdA to catalyze the catalase reaction, which is one of the redox reactions. In order to investigate the catalase activity of OxdA, we measured the production of O<sub>2</sub> by using an oxygen electrode. As a result, we observed production of O<sub>2</sub> for the first time (S1A Fig). This finding suggests that OxdA catalyzes the catalase reaction. We also found that the heat-treated OxdA did not exhibit the catalase activity, strongly supporting that OxdA catalyzes the catalase reaction. Next, we carried out the catalase assaying of OxdA in reaction mixtures containing various concentrations of H<sub>2</sub>O<sub>2</sub>, and determined the kinetic parameters (Table 1). Moreover, we observed other redox activities (peroxidase and peroxygenase) of OxdA, and determined the kinetic parameters (Tables 2, 3 and 4). Our findings for the first

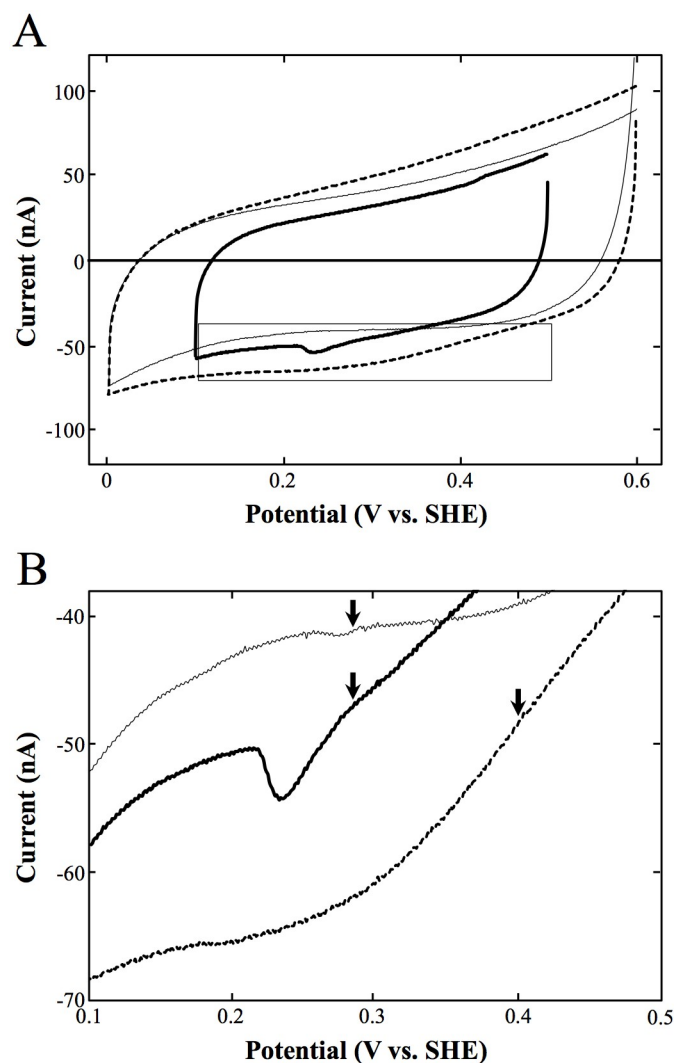

**Fig 7. The reduction potentials of OxdAs (WT, H320D and H320A) determined by cyclic voltammetry.** Electro-reduction of 10  $\mu\text{M}$  OxdA(WT) (thick line), OxdA(H320D) (dotted line), or OxdA(H320A) (thin line) at 3 mm diameter Au electrode, a scan rate of 5 mV/s and room temperature ( $25 \pm 1^\circ\text{C}$ ). Overall measurements (A), zoom in its square (B), the onset potentials of OxdAs (WT, H320D and H320A) (arrows).

<https://doi.org/10.1371/journal.pone.0175846.g007>

time demonstrate that OxdA catalyzes three kinds of redox reactions among heme enzymes catalyzing non-redox reactions [51], while general heme enzymes catalyze redox reactions.

### Effects of the H320D mutation on redox activities

Here, we constructed OxdA(H320D) by the replacement of His320 with Asp to mimic the active site of CPO (S12B Fig). After the purification of OxdA(H320D), its redox activities (catalase, peroxidase and peroxygenase) were measured. As a result, OxdA(H320D) was found to exhibit three kinds of redox activities like OxdA(WT). Moreover, comparison of the determined kinetic parameters between OxdAs (WT and H320D) revealed that the  $V_{max}$  values of OxdA(H320D) were 36 (in the catalase reaction), 2.5 (in the peroxidase reaction with guaiacol), 9.7 (in the peroxidase reaction with ABTS), and 6.5 (in the peroxygenase reaction) times higher than those of OxdA(WT), respectively (Tables 1–4). It is apparent

that the H320D mutation enhances all the redox activities. The higher redox activities of OxdA(H320D) would be caused by its onset potential (0.40 V vs. SHE), being higher than that of OxdA(WT) (0.28 V vs. SHE) (Fig 7). Furthermore, the  $K_m$  values for  $H_2O_2$  (in the catalase reaction), guaiacol (in the peroxidase reaction with guaiacol), ABTS (in the peroxidase reaction with ABTS), and 1-MN (in the peroxygenase reaction) of OxdA(H320D) were equivalent to 130%, 3800%, 57% and 110% of those of OxdA(WT), respectively (Tables 1–4). These findings indicate that the H320D mutation significantly altered the affinity of OxdA for substrates.

For all the redox reactions of OxdAs (WT and H320D) we measured, interesting findings suggesting a difference in the influence on these activities with a high concentration of  $H_2O_2$  between OxdAs (WT and H320D) were obtained [S5 Fig, Figs 2A(a), 3A(a) and 4B]. Generally, a high concentration of  $H_2O_2$  inhibits various enzymatic reactions due to its strong oxidizing power [49]. In the cases of OxdAs (WT and H320D), the catalase (S5 Fig) and peroxidase [Fig 2A(a)] activities (using guaiacol as a substrate) were inhibited by a high concentration of  $H_2O_2$ . For example, the catalase activity of OxdA(H320D) in the presence of 400 mM  $H_2O_2$  ( $17 \pm 1$  units/mg) was about 3 times lower than that of 100 mM  $H_2O_2$  ( $53 \pm 2$  units/mg). These inhibitions would be due to the above reason. These activities of OxdA(H320D) greatly decreased with high concentrations of  $H_2O_2$  compared with those of OxdA(WT), indicating that the H320D mutation not only enhances the redox activities of OxdA but also would decrease its  $H_2O_2$  tolerance. On the other hand, the peroxidase (using ABTS as a substrate) [Fig 3A(a)] and peroxygenase (Fig 4B) activities of OxdAs (WT and H320D) were significantly reduced by low concentrations (50–100 mM) of  $H_2O_2$ , although their catalase and peroxidase (using guaiacol as a substrate) activities were not reduced by the same concentrations of  $H_2O_2$ . For instance, the peroxidase activity of OxdA(H320D) using ABTS as a substrate in the presence of 100 mM  $H_2O_2$  ( $9.2 \pm 0.5$  units/mg) was equivalent to 30% of that with 25 mM  $H_2O_2$  ( $31 \pm 1$  units/mg), although the peroxidase activity of OxdA(H320D) using guaiacol as a substrate in the presence of 100 mM  $H_2O_2$  ( $66 \pm 6$  units/mg) was equivalent to 140% of that with 25 mM  $H_2O_2$  ( $48 \pm 13$  units/mg). Therefore, inhibition of the peroxidase (using ABTS as a substrate) and peroxygenase activities would be caused by competition between the catalase activity and these activities rather than  $H_2O_2$  tolerance. During the catalase reaction, compound I [an enzyme intermediate, which contains an oxyferryl iron center and a second oxidizing equivalent stored as a radical ( $Fe(IV) = O^{+*}$ ) (formal oxidation state of +5)] [52] is produced and then consumed, resulting in a return to the native form (formal oxidation state +3) [52]. For the peroxidase reaction, compound I is produced and then consumed, yielding compound II [a second intermediate in which the radical is discharged leaving only the oxyferryl iron (formal oxidation state +4)] [52] (Fig 8A). As for the peroxygenase reaction, compound I is produced and then utilized to oxidize a substrate other than  $H_2O_2$  (Fig 8B). During the peroxidase or peroxygenase reaction, the catalase reaction also proceeds because  $H_2O_2$  contained in the reaction mixtures acts as a substrate for the catalase reaction. For the peroxidase (using ABTS as a substrate) and peroxygenase activity, respectively, the catalase reaction would proceed dominantly rather than the peroxidase or peroxygenase one in the presence of excess of  $H_2O_2$  for the other substrate (ABTS or 1-MN). Namely, compound I would be utilized dominantly for the catalase reaction rather than the peroxidase or peroxygenase reaction. As a consequence, the peroxidase (using ABTS as a substrate) and peroxygenase activities would be inhibited. With a high concentration of  $H_2O_2$ , inhibition of the redox activities of OxdA (H320D) was greater than in the case of OxdA(WT) [Figs 3A(a) and 4B]. These results would be responsible for the higher catalase activity of OxdA(H320D) compared with that of OxdA (WT).



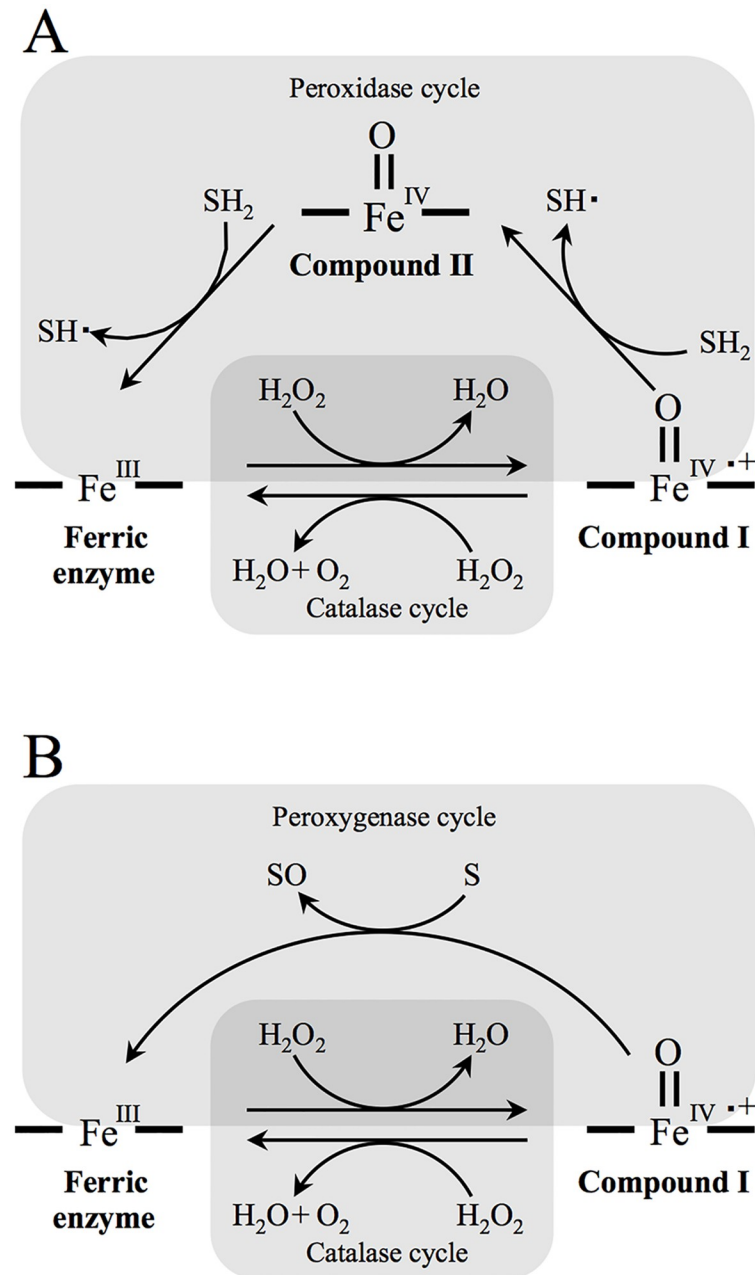

**Fig 8. Proposed pathways of heme enzymes for the redox reactions.** Peroxidase pathway (A), Peroxygenase pathway (B).

<https://doi.org/10.1371/journal.pone.0175846.g008>

### Effects of the H320A mutation on redox activities

We used OxdA(H320A) to examine the effect of the charge of the 320th residue in the distal site of heme (S12C Fig). On measurement of its redox activities (catalase, peroxidase and peroxygenase), the catalase and peroxidase activities of OxdA(H320A) were found for the first time, while its peroxygenase activity was not detected. Furthermore, the kinetic parameters of its catalase and peroxidase activities were determined. The  $V_{max}$  value of its catalase activity was equivalent 140% of that of OxdA(WT) (Table 1), indicating that the H320A mutation did

not markedly change its catalase activity. The catalase activity comparable with that of OxdA (WT) would be due to its onset potential (0.28 V vs. SHE), which is similar to that of OxdA (WT) (0.28V vs. SHE) (Fig 7). On the other hand, the  $V_{max}$  values of peroxidase activity using guaiacol as a substrate and peroxidase activity using ABTS as a substrate were equivalent to 6.0% and 38% of those of OxdA(WT), respectively (Tables 2 and 3), indicating that the H320A mutation decreases the peroxidase activity. The lower peroxidase activity and lack of peroxygenase activity of OxdA(H320A) would be caused by removal of the charge of the 320th residue due to the H320A mutation. Furthermore, the  $K_m$  value for  $H_2O_2$  (in the catalase reaction) of OxdA(H320A) was equivalent to 10% of that of OxdA(WT) (Table 1), indicating that the H320A mutation would significantly enhance its affinity for  $H_2O_2$  due to its wide heme pocket. On the other hand, the  $K_m$  value for guaiacol (in the peroxidase reaction with guaiacol) and for ABTS (in the peroxidase reaction with ABTS) of OxdA(H320A) were equivalent to 3200% and 100% of those of OxdA(WT), respectively (Tables 2 and 3), indicating that the H320A mutation markedly decreased its affinity for guaiacol.

With a high concentration of  $H_2O_2$ , the inhibition of the peroxidase activity of OxdA (H320A) was greater than those of other OxdAs (WT and H320D) (Figs 2A and 3A). This would be caused by the lower  $K_m$  value for  $H_2O_2$  of OxdA(H320A) than those of other OxdAs (WT and H320D). In the peroxidase reaction, the catalase reaction of OxdA(H320A) would proceed dominantly due to its higher affinity for  $H_2O_2$  than those of other OxdAs (WT and H320D). Thus, the competition between its catalase activity and peroxidase activity in the peroxidase reaction would be greater than those of other OxdAs (WT and H320D).

### New reaction product in the peroxygenase reaction of OxdA(H320D)

In the reaction mixture with OxdA(WT), Russig's blue was formed as a peroxygenase reaction product. On the other hand, in the reaction mixture with OxdA(H320D) instead of OxdA (WT), an increase in the absorbance of Russig's blue (610 nm) was not detected at all. Alternatively, the color of the reaction mixture changed to a significantly different one with OxdA (WT) (Fig 5). Moreover, a characteristic absorption spectrum of the reaction mixture containing OxdA(H320D), which is different from that of the mixture containing OxdA(WT), was observed [Fig 6A(a)]. These findings suggest a new reaction product different from Russig's blue. In order to identify the new product, the reaction mixture with OxdA(H320D) was analyzed by HPLC under the conditions given under "Materials and Methods." As a result, the peak of the new reaction product was observed at 3.1 min in the UV-vis chromatogram. On the addition of inactivated OxdA(H320D) instead of OxdA(H320D), on the other hand, the peak was not observed (Fig 6B). Next, we purified the new reaction product by HPLC as described under "Materials and Methods," and analyzed the purified product. In the UV-vis chromatogram, the peak of the purified new reaction product was observed at the same retention time (3.1 min) (Fig 6B), demonstrating that the new product present in the reaction mixture did not change into other compounds during the purification procedures. Based on the mass spectrum of the peak (Fig 6C), the molecular mass of the new reaction product is 174 in correspondence with the value of a 1 molecule oxygen adduct of 1-MN, suggesting that the new product is formed through hydroxylation. Furthermore, we measured NMR spectra of the purified new product (Fig 6D–6F), and identified it as 1-methoxy-2-naphthalenol, which has never been reported as a reaction product of the peroxygenase reaction. In the so-far known peroxygenase reaction with 1-MN as a substrate, the C-4 position of the naphthalene ring of 1-MN is hydroxylated to yield 4-methoxy-1-naphthalenol. Subsequently, two further peroxygenase reactions cause the condensation of two 4-methoxy-1-naphthalenols, resulting in the production of Russig's blue [Fig 4A(a)]. In contrast, 1-methoxy-2-naphthalenol was

produced through C-2 hydroxylation in the naphthalene ring of 1-MN [Fig 4A(b)], when OxdA(H320D) was used. However, the condensation of two 1-methoxy-2-naphthalenols through further peroxygenase reaction did not occur. The difference in the peroxygenase reaction product between OxdAs (WT and H320D) demonstrates that the H320D mutation significantly alters the hydroxylation site of 1-MN only by replacement of one amino acid residue. These findings would suggest that the direction of the naphthalene ring of 1-MN as to the heme iron may be quite different between OxdAs (WT and H320D). It is indicated that the His320 residue of OxdA is important for orientation of the substrate for catalysis of the redox reaction, and its mutation will cause a unique alteration of the reaction product. Moreover, we found no peroxygenase activity toward 1-MN in OxdA(H320A), which lacks acid-base behavior of the 320th residue in the aldoxime dehydratase reaction [32]. Based on the above findings and the peroxygenase activity of OxdA(WT) exhibiting acid-base behavior of His 320 in the aldoxime dehydratase reaction, and OxdA(H320D) possessing an Asp residue acting as an acid-base catalyst in redox reactions [41], the charge of the 320th residue would play a role in catalysis of the peroxygenase reaction for 1-MN.

In summary, our results for the first time demonstrate three kinds of redox catalysis of OxdA. Its H320D mutant showed higher redox activities and different affinities for substrates except for H<sub>2</sub>O<sub>2</sub> from those of OxdA(WT). Also, its H320A mutant showed significantly higher affinity for H<sub>2</sub>O<sub>2</sub> than that of OxdAs (WT and H320D). Furthermore, in the peroxygenase reaction, we observed a difference in the reaction product between the reactions of OxdAs (WT and H320D). These findings indicate that the His320 residue of OxdA is important for not only its the redox activities but also its substrate binding. Considering the extremely uncommon heme pocket of OxdA [30–32], there is a possibility that other unexpected reaction products could arise through the unique redox reactions of OxdA or its mutants. Further studies including structural analyses are required to elucidate the differences in the orientation of the substrate (1-MN) between OxdAs (WT and H320D).

## Supporting information

**S1 Fig. Assaying of the catalase reaction using OxdAs (WT, H320D and H320A).** Time-dependent O<sub>2</sub> production by OxdA(WT) (A), OxdA(H320D) (B) and OxdA(H320A) (C). The reaction mixture contained 10 mM H<sub>2</sub>O<sub>2</sub> and 2 μM OxdA(WT), 1 μM OxdA(H320A), or 0.5 μM OxdA(H320D). The reactions were carried out under the “standard assay A” conditions as described under “Materials and Methods.” The reaction was initiated (arrow) by the addition of an OxdA (WT, H320D and H320A).

(PDF)

**S2 Fig. Absorption spectra of heat-treated OxdAs (WT, H320A and H320D).** The absorption spectra of 3 μM OxdA(WT) (A), OxdA(H320D) (B) and OxdA(H320D) (C) at pH 7.0 and 28°C before heat-treatment (thin line), or after heat-treatment (broken line) for 10 min at 98°C.

(PDF)

**S3 Fig. Hanes-Woolf plots of the catalase activities of OxdAs.** The reactions were carried out under the “standard assay A” conditions as described under “Materials and Methods.” OxdA(WT) (A), OxdA(H320D) (B) and OxdA(H320A) (C).

(PDF)

**S4 Fig. Time-dependent increase in the absorbance at 470 nm of OxdAs.** The reaction mixture contained 10 mM guaiacol and 25 mM H<sub>2</sub>O<sub>2</sub>. The reactions were carried out under the

“standard assay B” conditions as described under “Materials and Methods.” OxdA(WT) (solid line), OxdA(H320D) (broken line) and OxdA(H320A) (thin line).  
(PDF)

**S5 Fig. Catalase activities of OxdAs with a high concentration of H<sub>2</sub>O<sub>2</sub>.** The reactions with high concentrations of H<sub>2</sub>O<sub>2</sub> (100~400 mM) were carried out under the “standard assay A” conditions as described under “Materials and Methods.” For all data points, values are means ± mean error. OxdA(WT) (A), OxdA(H320D) (B) and OxdA(H320A) (C).  
(PDF)

**S6 Fig. Hanes-Woolf plots of the peroxidase activities of OxdAs in the presence of guaiacol.** The reactions were carried out under the “standard assay B” conditions as described under “Materials and Methods.” OxdA(WT) (A), OxdA(H320D) (B) and OxdA(H320A) (C).  
(PDF)

**S7 Fig. Time-dependent increase in the absorbance at 430 nm of OxdAs.** The reaction mixture contained 2.5 mM ABTS and 25 mM H<sub>2</sub>O<sub>2</sub>. The reactions were carried out under the “standard assay C” conditions as described under “Materials and Methods.” OxdA(WT) (solid line), OxdA(H320D) (broken line) and OxdA(H320A) (thin line).  
(PDF)

**S8 Fig. Hanes-Woolf plots of the peroxidase activities of OxdAs in the presence of ABTS.** The reactions were carried out under the “standard assay C” conditions as described under “Materials and Methods.” OxdA(WT) (A), OxdA(H320D) (B) and OxdA(H320A) (C).  
(PDF)

**S9 Fig. Time-dependent increase in the absorbance at 610 nm of OxdA(WT) and OxdA(H320A).** The reaction mixture contained 0.5 mM 1-MN and 5 mM H<sub>2</sub>O<sub>2</sub>. The reaction was carried out under the “standard assay D” conditions as described under “Materials and Methods.” 1 μM OxdA(WT) (solid line), 1 μM (thin line) and 10 μM (broken line) OxdA(H320A).  
(PDF)

**S10 Fig. Hanes-Woolf plots of the peroxygenase activities of OxdA(WT) and OxdA(H320D).** The reactions were carried out under the “standard assay D” conditions as described under “Materials and Methods.” OxdA(WT) (A) and OxdA(H320D) (B).  
(PDF)

**S11 Fig. Time-dependent increase in the absorbance at 334 nm of OxdA(H320A).** The reaction mixture contained 0.5 mM 1-MN and 5 mM H<sub>2</sub>O<sub>2</sub>. The reaction was carried out under the “standard assay D” conditions as described under “Materials and Methods.” 1 μM (thin line) and 10 μM (solid line) OxdA(H320A).  
(PDF)

**S12 Fig. Schematic representation of the structural details of the active site of OxdAs.** The structural details of OxdA(WT) (A), OxdA(H320D) (B), and OxdA(H320A) (C).  
(PDF)

## Acknowledgments

We thank Dr. Kazunobu Konishi for the helpful discussions, Mr. Nobuto Ohkubo for the helpful technical advice. This work was supported by a Grant-in-Aid for Scientific Research from the Ministry of Education, Culture, Sports, Science and Technology (MEXT), Japan.

## Author Contributions

**Conceptualization:** MY YH TK MK.

**Data curation:** MY YH TK ST MK.

**Formal analysis:** MY YH TK ST MK.

**Funding acquisition:** MK.

**Investigation:** MY YH TK ST MK.

**Project administration:** MY YH MK.

**Supervision:** MK.

**Validation:** MY YH TK ST MK.

**Writing – original draft:** MY YH MK.

**Writing – review & editing:** MY YH MK.

## References

1. Kobayashi M, Shimizu S. Metalloenzyme nitrile hydratase: structure, regulation, and application to biotechnology. *Nature Biotechnol.* 1998 Aug; 16(8): 733–736
2. Komeda H, Kobayashi M, Shimizu S. A novel gene cluster including the *Rhodococcus rhodochrous* J1 *nhlBA* genes encoding a low molecular mass nitrile hydratase (L-NHase) induced by its reaction product. *J. Biol. Chem.* 1996 Jun 28; 271(26): 15796–15802
3. Komeda H, Kobayashi M, Shimizu S. Characterization of the gene cluster of high-molecular-mass nitrile hydratase (H-NHase) induced by its reaction product in *Rhodococcus rhodochrous* J1. *Proc. Natl. Acad. Sci. U. S. A.* 1996 Apr 30; 93(9): 4267–4272
4. Kobayashi M, Komeda H, Yanaka N, Nagasawa T, Yamada H. Nitrilase from *Rhodococcus rhodochrous* J1. Sequencing and overexpression of the gene and identification of an essential cysteine residue. *J. Biol. Chem.* 1992 Oct 15; 267(29): 20746–20751 PMID: [1400390](https://pubmed.ncbi.nlm.nih.gov/1400390/)
5. Goda M, Hashimoto Y, Shimizu S, Kobayashi M. Discovery of a novel enzyme, isonitrile hydratase, involved in nitrogen-carbon triple bond cleavage. *J. Biol. Chem.* 2001 Jun 29; 276(26): 23480–23485
6. Goda M, Hashimoto Y, Takase M, Herai S, Iwahara Y, Higashibata H, et al. Isonitrile hydratase from *Pseudomonas putida* N19-2. Cloning, sequencing, gene expression, and identification of its active acid residue. *J. Biol. Chem.* 2001 Nov 29; 277(48): 45860–45865 <https://doi.org/10.1074/jbc.M208571200> PMID: [12244065](https://pubmed.ncbi.nlm.nih.gov/12244065/)
7. Fukatsu H, Hashimoto Y, Goda M, Higashibata H, Kobayashi M. Amine-synthesizing enzyme *N*-substituted formamide deformylase: screening, purification, characterization, and gene cloning. *Proc. Natl. Acad. Sci. U. S. A.* 2004 Sep 21; 101(38): 13726–13731 <https://doi.org/10.1073/pnas.0405082101> PMID: [15358859](https://pubmed.ncbi.nlm.nih.gov/15358859/)
8. Kobayashi M, Nagasawa T, Yamada H. Enzymatic synthesis of acrylamide: a success story not yet over. *Trends Biotechnol.* 1992 Nov; 10(11): 402–408 PMID: [1368882](https://pubmed.ncbi.nlm.nih.gov/1368882/)
9. Yamada H, Kobayashi M. Nitrile hydratase and its application to industrial production of acrylamide. *Biosci. Biotechnol. Biochem.* 1996 Sep; 60(9): 1391–1400
10. Kobayashi M, Yanaka N, Nagasawa T, Yamada H. Primary structure of an aliphatic nitrile-degrading enzyme, aliphatic nitrilase, from *Rhodococcus rhodochrous* K22 and expression of its gene and identification of its active site residue. *Biochemistry* 1992 Sep; 31(37): 9000–9007 PMID: [1390687](https://pubmed.ncbi.nlm.nih.gov/1390687/)
11. Komeda H, Hori Y, Kobayashi M, Shimizu S. Transcriptional regulation of the *Rhodococcus rhodochrous* J1 *nitA* gene encoding a nitrilase. *Proc. Natl. Acad. Sci. U. S. A.* 1996 Oct 1; 93(20): 10572–10577 PMID: [8855219](https://pubmed.ncbi.nlm.nih.gov/8855219/)
12. Kobayashi M, Izui H, Nagasawa T, Yamada H. Nitrilase in biosynthesis of the plant hormone indole-3-acetic acid from indole-3-acetonitrile: cloning of the *Alcaligenes* gene and site-directed mutagenesis of cysteine residues. *Proc. Natl. Acad. Sci. U. S. A.* 1993 Jan 1; 90(1): 247–251
13. Kobayashi M, Suzuki T, Fujita T, Masuda M, Shimizu S. Occurrence of enzymes involved in biosynthesis of indole-3-acetic acid from indole-3-acetonitrile in plant-associated bacteria, *Agrobacterium* and *Rhizobium*. *Proc. Natl. Acad. Sci. U. S. A.* 1995 Jan 31; 92(3): 714–718

14. Kobayashi M, Shimizu S. Cobalt proteins. *Eur. J. Biochem.* 1999 Apr; 261(1): 1–9
15. Asano Y, Tani Y, Yamada H. A new enzyme, nitrile hydratase, which degrades acetonitrile in combination with amidase. *Agric. Biol. Chem.* 1980; 44(9): 2251–2252
16. Popescu V C, Münck E, Fox B G, Sanakis Y, Cummings J G, Turner I M Jr, et al. Mossbauer and EPR studies of the photoactivation of nitrile hydratase. *Biochemistry* 2001 Jun 10; 40(27): 7984–7991
17. Kobayashi M, Fujiwara Y, Goda M, Komeda H, Shimizu S. Identification of active sites in amidase: evolutionary relationship between amide bond- and peptide bond-cleaving enzymes. *Proc. Natl. Acad. Sci. U. S. A.* 1997 Oct 28; 94(22): 11986–11991 PMID: [9342349](https://pubmed.ncbi.nlm.nih.gov/9342349/)
18. Kobayashi M, Goda M, Shimizu S. The catalytic mechanism of amidase also involves nitrile hydrolysis. *FEBS Lett.* 1998 Nov 20; 439(3): 325–328
19. Kobayashi M, Komeda H, Nagasawa T, Nishiyama M, Horinouchi S, Beppu T, et al. Amidase coupled with low-molecular-mass nitrile hydratase from *Rhodococcus rhodochrous* J1. Sequencing and expression of the gene and purification and characterization of the gene product. *Eur. J. Biochem.* 1993 Oct 1; 217(1): 327–336
20. Yamada H, Shimizu S, Kobayashi M. Hydratases involved in nitrile conversion: screening, characterization and application. *Chem. Rec.* 2001; 1(2): 152–161 PMID: [11893064](https://pubmed.ncbi.nlm.nih.gov/11893064/)
21. Endo I, Odaka M, Yohda M. An enzyme controlled by light: the molecular mechanism of photoreactivity in nitrile hydratase. *Trends Biotechnol.* 1999 Jun; 17(6): 244–248
22. Oinuma K-I, Hashimoto Y, Konishi K, Goda M, Noguchi T, Higashibata H, et al. Novel aldoxime dehydratase involved in carbon-nitrogen triple bond synthesis of *Pseudomonas chlororaphis* B23. Sequencing, gene expression, purification, and characterization. *J. Biol. Chem.* 2003 Aug 8; 278(32): 29600–29608 <https://doi.org/10.1074/jbc.M211832200> PMID: [12773527](https://pubmed.ncbi.nlm.nih.gov/12773527/)
23. Nagasawa T, Nanba H, Ryuno K, Takeuchi K, Yamada H. Nitrile hydratase of *Pseudomonas chlororaphis* B23. Purification and characterization. *Eur. J. Biochem.* 1987 Feb 2; 162(2): 691–698
24. Hashimoto Y, Hosaka H, Oinuma K-I, Goda M, Higashibata H, Kobayashi M. Nitrile pathway involving acyl-CoA synthetase: overall metabolic gene organization and purification and characterization of the enzyme. *J. Biol. Chem.* 2005 Mar 11; 280(10): 8660–8667 <https://doi.org/10.1074/jbc.M405686200> PMID: [15632196](https://pubmed.ncbi.nlm.nih.gov/15632196/)
25. Nagasawa T, Ryuno K, Yamada H. Superiority of *Pseudomonas chlororaphis* B23 nitrile hydratase as a catalyst for the enzymatic production of acrylamide. *Experientia* 1989 Dec; 45(11): 1066–1070
26. Kato Y, Nakamura K, Sakiyama H, Mayhew S G, Asano Y. Novel heme-containing lyase, phenylacetaldoxime dehydratase from *Bacillus* sp. strain OxB-1: purification, characterization, and molecular cloning of the gene. *Biochemistry* 2000 Feb 1; 39(4): 800–809
27. Sawai H, Sugimoto H, Kato Y, Asano Y, Shiro Y, Aono S. X-ray crystal structure of Michaelis complex of aldoxime dehydratase. *J. Biol. Chem.* 2009 Nov 13; 284(46): 32089–32096 <https://doi.org/10.1074/jbc.M109.018762> PMID: [19740758](https://pubmed.ncbi.nlm.nih.gov/19740758/)
28. Oinuma K-I, Ohta T, Konishi K, Hashimoto Y, Higashibata H, Kitagawa T, et al. Heme environment in aldoxime dehydratase involved in carbon-nitrogen triple bond synthesis. *FEBS Lett.* 2004 Jun 18; 568(1–3): 44–48
29. Konishi K, Ishida K, Oinuma K-I, Ohta T, Hashimoto Y, Higashibata H, et al. Identification of crucial histidines involved in carbon-nitrogen triple bond synthesis by aldoxime dehydratase. *J. Biol. Chem.* 2004 Nov 12; 279(46): 47619–47625 <https://doi.org/10.1074/jbc.M407223200> PMID: [15339918](https://pubmed.ncbi.nlm.nih.gov/15339918/)
30. Konishi K, Ohta T, Oinuma K-I, Hashimoto Y, Kitagawa T, Kobayashi M. Discovery of a reaction intermediate of aliphatic aldoxime dehydratase involving heme as an active center. *Proc. Natl. Acad. Sci. U. S. A.* 2006 Jan 17; 103(3): 564–568
31. Oinuma K-I, Kumita H, Ohta T, Konishi K, Hashimoto Y, Higashibata H, et al. Stopped-flow spectrophotometric and resonance Raman analyses of aldoxime dehydratase involved in carbon—nitrogen triple bond synthesis. *FEBS Lett.* 2005 Feb 28; 579(6): 1394–1398 <https://doi.org/10.1016/j.febslet.2005.01.037> PMID: [15733847](https://pubmed.ncbi.nlm.nih.gov/15733847/)
32. Nomura J, Hashimoto H, Ohta T, Hashimoto Y, Wada K, Naruta Y, et al. Crystal structure of aldoxime dehydratase and its catalytic mechanism involved in carbon-nitrogen triple-bond synthesis. *Proc. Natl. Acad. Sci. U. S. A.* 2013 Feb 19; 110(8): 2810–2815
33. Pinakoulaki E, Koutsoupakis C, Sawai H, Pavlou A, Kato Y, Asano Y, et al. Aldo xime dehydratase: probing the heme environment involved in the synthesis of the carbon-nitrogen triple bond. *J. Phys. Chem. B.* 2011 Nov 10; 115(44): 13012–13018 <https://doi.org/10.1021/jp205944e> PMID: [21942263](https://pubmed.ncbi.nlm.nih.gov/21942263/)
34. Olson J S, Phillips G N Jr. Kinetic Pathways and Barriers for Ligand Binding to Myoglobin. *J. Biol. Chem.* 1996 Jul 26; 271(30): 17593–17596 PMID: [8698688](https://pubmed.ncbi.nlm.nih.gov/8698688/)

35. Krishna M C, Samuni A, Taira J, Goldstein S, Mitchell J B, Russo A. Stimulation by nitroxides of catalase-like activity of heme proteins. Kinetics and mechanism. *J. Biol. Chem.* 1996 Oct 18; 271(42): 26018–26025 PMID: [8824241](#)
36. Brancaccio A, Cutruzzolá F, Allocatelli C T, Brunori M, Smerdon S J, Wilkinson A J, et al. Structural factors governing azide and cyanide binding to mammalian metmyoglobins. *J. Biol. Chem.* 1994 May 13; 269(19): 13843–13853 PMID: [8188662](#)
37. Dou Y, Olson J S, Wilkinson A J, Ikeda-Saito M. Mechanism of hydrogen cyanide binding to myoglobin. *Biochemistry* 1996 Jun 4; 35(22): 7107–7113
38. Yonetani T, Schleyer H. Studies on cytochrome c peroxidase. IX. The reaction of ferrimyoglobin with hydroperoxides and a comparison of peroxide-induced compounds of ferrimyoglobin and cytochrome c peroxidase. *J. Biol. Chem.* 1967 Apr 25; 242(8): 1974–1979 PMID: [4290448](#)
39. Murthy M R, Reid T J 3rd, Sicignano A, Tanaka N, Rossmann M G. Structure of beef liver catalase. *J. Mol. Biol.* 1981 Oct 25; 152(2): 465–499
40. Sundaramoorthy M, Turner J, Poulos T L. The crystal structure of chloroperoxidase: a heme peroxidase—cytochrome P450 functional hybrid. *Structure* 1995 Dec 15; 3(12): 1367–1377 PMID: [8747463](#)
41. Matsui T, Ozaki S-i, Watanabe Y. Formation and catalytic roles of compound I in the hydrogen peroxide-dependent oxidations by His64 myoglobin mutants. *J. Am. Chem. Soc.* 1999 Nov 3; 121(43): 9952–9957
42. Hayashi Y, Yamazaki I. The oxidation-reduction potentials of compound I/compound II and compound II/ferric couples of horseradish peroxidases A2 and C. *J. Biol. Chem.* 1979 Sep 25; 254(18): 9101–9106 PMID: [39073](#)
43. Poulos T L, Freer S T, Alden R A, Edwards S L, Skogland U, Takio K, et al. The crystal structure of cytochrome c peroxidase. *J. Biol. Chem.* 1980 Jan 25; 255(2): 575–580
44. Green M T, Dawson J H, Gray H B. Oxoiron(IV) in chloroperoxidase compound II is basic: implications for P450 chemistry. *Science* 2004 Jun 11; 304(5677): 1653–1656 <https://doi.org/10.1126/science.1096897> PMID: [15192224](#)
45. Matsui T, Ozaki S-i, Liong E, Phillips G N Jr, Watanabe Y. Effects of the location of distal histidine in the reaction of myoglobin with hydrogen peroxide. *J. Biol. Chem.* 1999 Jan 29; 274(5): 2838–2844 PMID: [9915818](#)
46. Shoji O, Wiese C, Fujishiro T, Shirataki C, Wunsch B, Watanabe Y. Aromatic C—H bond hydroxylation by P450 peroxxygenases: a facile colorimetric assay for monooxygenation activities of enzymes based on Russig's blue formation. *J. Biol. Inorg. Chem.* 2010 May 19; 15(7): 1109–1115
47. Onoda H, Shoji O, Watanabe Y. Acetate anion-triggered peroxygenation of non-native substrates by wild-type cytochrome P450s. *Dalton Trans.* 2015 Jun 9; 44(34): 15316–15323 <https://doi.org/10.1039/c5dt00797f> PMID: [26125329](#)
48. Laemmli U K. Cleavage of structural proteins during the assembly of the head of bacteriophage T4. *Nature* 1970 Aug 15; 227(5259): 680–685 PMID: [5432063](#)
49. Kawasaki C, Nagano H, Iio T, Kondo M. Studies on mechanisms of bactericidal action of hydrogen peroxide. *Food Hyg. Saf. Sci.* 1970 Mar 12; 11(3): 155–160
50. Liao R Z, Thiel W. Why is the oxidation state of iron crucial for the activity of heme-dependent aldoxime dehydratase? A QM/MM Study. *J. Phys. Chem.* 2012 Jul 16; 116(8): 9396–9408
51. Beltrán J, Kloss B, Hosler J P, Geng J, Liu A, Modi A, et al. Control of carotenoid biosynthesis through a heme-based *cis-trans* isomerase. *Nat. Chem. Biol.* 2015 Jun 15; 11(8): 598–605 <https://doi.org/10.1038/nchembio.1840> PMID: [26075523](#)
52. Valentine J. S, Foote C S, Greenburg A, Liebman J F. *Active Oxygen in Biochemistry*. Chapman & Hall. 1995
