# Supplementary material for: New function of aldoxime dehydratase: Redox catalysis and the formation of an expected product
Source: PLOS journal article supplement (doi:10.1371/journal.pone.0175846), 2017-04-14

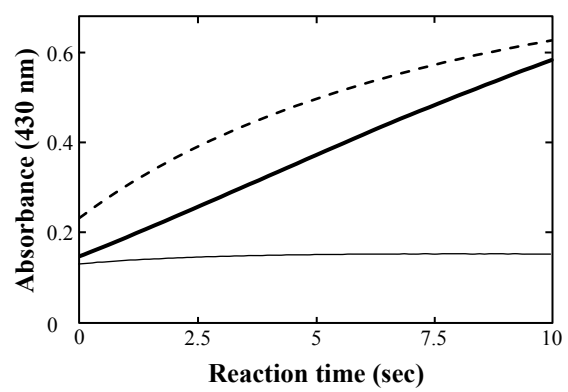

Supplement: S7 (10.1371/journal.pone.0175846.s007) [file journal.pone.0175846.s007]
